1 Nod2 protects remote small intestinal sites in case of colonic inflammation.

2

3 Ziad Al Nabhani<sup>1,2</sup>, Dominique Berrebi<sup>1,2,3,\$</sup>, Christine Martinez-Vinson<sup>3,\$</sup>, Nicolas  
4 Montcuquet<sup>4,5</sup>, Gilles Dietrich<sup>6</sup>, Gurminder Singh<sup>7</sup>, Jerrold R. Turner<sup>7</sup>, Chrystele Madre<sup>1,2,3</sup>,  
5 Maryline Roy<sup>1,2</sup>, Eric Ogier-Denis<sup>1,2</sup>, Monique Dussailant<sup>1,2,3</sup>, Nadine Cerf-Bensussan<sup>4,5</sup>,  
6 Habib Zouali<sup>8</sup>, Camille Jung<sup>1,2,3</sup>, Fanny Daniel<sup>1</sup>, Frédérick Barreau<sup>1, 2, 6#</sup>, Jean-Pierre  
7 Hugot<sup>1,2,3#\*</sup>.

8

9 **Affiliations :**

10 <sup>1</sup>Laboratoire d'excellence Inflammex, Université Paris-Diderot Sorbonne Paris-Cité, UMR  
11 1149, F-75018 Paris, France.

12 <sup>2</sup>INSERM, UMR 1149, F-75018 Paris, France.

13 <sup>3</sup>Assistance Publique Hôpitaux de Paris, services des maladies digestives et respiratoires de  
14 l'enfant et service d'anatomie pathologique, Hôpital Robert Debré, F-75019 Paris, France.

15 <sup>4</sup>INSERM, UMR 989, F-75015 Paris, France.

16 <sup>5</sup>Université Paris Descartes – Sorbonne Paris Cité, Institut IMAGINE, F-75015 Paris, France.

17 <sup>6</sup>IRSD, Université de Toulouse, INSERM, INRA, ENVT, UPS, Toulouse, France.

18 <sup>7</sup>Department of Pathology, Brigham and Women's Hospital, Harvard Medical School, Boston,  
19 Massachusetts.

20 <sup>8</sup>Fondation Jean-Dausset CEPH, F-75011 Paris, France.

21 \$ and # equal contribution

22 **\*Address for correspondence:**

23 Prof Jean-Pierre Hugot,

24 INSERM U843, Hôpital Robert Debré,

25 48 Boulevard Sérurier, 75019 Paris, France.

26 Phone : +33 1 40 03 57 12 ; Fax : +33 1 40 03 57 66

27 e-mail : [jean-pierre.hugot@rdb.aphp.fr](mailto:jean-pierre.hugot@rdb.aphp.fr)

28 **Running title: Nod2 and remote gut protection**

29 **Key words:** Nod2/intestinal permeability/Crohn's disease/gut barrier/myosin light chain  
30 kinase/CD4<sup>+</sup> T cells.

31 **Abbreviations:** CD: Crohn's disease; IM: intestinal mucosa (without Peyer's patches); MDP:  
32 Muramyl dipeptide; MLCK: myosin light chain kinase; NOD2: nucleotide oligomerization  
33 domain 2; RICK: receptor-interacting serine/threonine kinase; TAK1: transforming growth

34 factor  $\beta$ -activated kinase 1; TNBS: 2,4,6-trinitrobenzene sulfonic acid; TNF-R, TNF receptor;

35 WT: wild-type.

36

37           **ABSTRACT**

38           *NOD2* mutations are key risk factors for Crohn's disease (CD). *NOD2* contributes to  
39 intestinal homeostasis by regulating innate and adaptive immunity together with intestinal  
40 epithelial function. However, the roles of *NOD2* during gut inflammation is not known. We  
41 initially observed that *NOD2* expression was increased in epithelial cells remote from  
42 inflamed areas in CD patients. To explore this finding, *Nod2* mRNA expression,  
43 inflammation and gut permeability were examined in the small bowel of wild-type (WT),  
44 *Nod2* knockout and *Nod2* mutant mice after rectal instillation of 2,4,6-trinitrobenzene sulfonic  
45 acid (TNBS). In WT mice, *Nod2* upregulation remote to rectal injury was associated with pro-  
46 inflammatory cytokine expression, recirculating CD4<sup>+</sup> T-cells, increased paracellular  
47 permeability and myosin like chain kinase activity. *Nod2* knockout or mutation led to  
48 duodenitis and ileitis demonstrating the remote protective role of *Nod2*. Bone marrow stem  
49 cell (BMSC) transplantations indicated that the small intestinal inflammation was due to  
50 *NOD2* loss in both hematopoietic and non-hematopoietic compartments. As a whole, WT but  
51 not mutant *NOD2* prevents disease extension at sites remote from the initial intestinal injury.

52

53

## 54 **Introduction**

55 Crohn's Disease (CD) is an inflammatory bowel disease (IBD) that can affect any part  
56 of the entire gastrointestinal tract. Genetic and epidemiological studies indicate that CD is a  
57 complex, multifactorial disorder. Interplay between genetics and the environment promotes  
58 development of gut abnormalities of autophagy, reticulum endoplasmic stress, innate and  
59 adaptive immune responses, Th-1 and Th-17 polarization, intestinal barrier dysfunction and  
60 microbial dysbiosis.<sup>1-3</sup>

61 Nucleotide oligomerization domain 2 (*NOD2*, also known as NLR-C2 and CARD15)  
62 is the most prominent susceptibility gene for CD.<sup>4,5</sup> One-third to one-half of CD patients have  
63 one or more *NOD2* mutations.<sup>6</sup> Wild-type *NOD2* is activated by muramyl dipeptides (MDP)  
64 which are components of the bacterial cell wall,<sup>7</sup> but CD-associated *NOD2* mutations prevent  
65 MDP responses.<sup>8</sup> CD can therefore be considered as an immune deficiency with insufficient  
66 responses to bacteria. Nevertheless, the exact mechanism by which *NOD2* mutations  
67 contribute to CD pathogenesis remains a matter of debate.<sup>9-12</sup>

68 *NOD2* regulates innate and adaptive immunity and intestinal permeability to maintain  
69 intestinal homeostasis.<sup>13-16</sup> Indeed, *Nod2* ablation in mice leads to an increased bacterial  
70 translocation across the small intestinal epithelium and excessive inflammatory cytokine  
71 secretion.<sup>14, 15</sup> This reflects impaired crosstalk between inflammatory cytokine-secreting CD4<sup>+</sup>  
72 T-cells and epithelial cells that express myosin light chain kinase (MLCK).<sup>15, 17</sup> Similarly,  
73 increased MLCK activity<sup>18</sup> and CD4<sup>+</sup> T-numbers have been observed in the intestinal mucosa  
74 of CD patients,<sup>19, 20</sup> and mouse models show that genetic activation of epithelial MLCK  
75 induces increases in mucosal CD4<sup>+</sup> T-numbers.<sup>21</sup> Anti-TNF- $\alpha$  antibody treatment restores the  
76 intestinal barrier in CD patients.<sup>22</sup> Impaired epithelial barrier function may therefore be an  
77 early event in CD lesions progression.

78 Here, we show that *NOD2* expression in CD patients is not only increased in  
79 inflammatory lesions but also at sites remote from injury. To define the mechanisms and  
80 impact of this upregulation, we explored the remote consequences on the small intestinal  
81 mucosa of a limited rectal injury induced by 2,4,6-trinitrobenzene sulfonic acid (TNBS).

82

## 83 **Results**

### 84 ***Epithelial NOD2 expression is increased in uninflamed mucosa of CD patients.***

85 In CD patients, epithelial *NOD2* expression is increased in mildly inflamed areas of  
86 the digestive tract, remote from sites of injury.<sup>23</sup> To confirm *NOD2* upregulation in remote  
87 areas, we examined expression in ileal and/or cecal biopsies from 17 treatment-naïve pediatric  
88 CD cases and five non-inflammatory controls. Although nine CD patients had heterozygous  
89 mutations in *NOD2* (1007fs n=3, R702W n=5 and R373C n=1), no histological differences  
90 were seen between patients with wild type or mutant *NOD2*. Immunostains using two  
91 different antibodies showed that *NOD2* was weakly expressed by surface enterocytes and rare  
92 mononuclear cells immediately below the epithelium in control ileum (Figure 1A). In contrast,  
93 *NOD2* expression was increased in ileum from CD patients (Figure 1B and C). While *NOD2*  
94 expression was upregulated in lamina propria mononuclear cells within inflammatory areas,  
95 the most prominent increases were in surface and glandular epithelial cells outside of  
96 inflammatory lesions (Figure 1B and C). Analysis of cecal biopsies gave similar results  
97 (Figure 1D-F).

98 We then determined *NOD2* mRNA expression in the epithelial and lamina propria  
99 compartments by qPCR after laser microdissection of biopsies from 8 patients. We observed  
100 that *NOD2* mRNA expression was inversely correlated in the epithelial and lamina propria  
101 compartments of the same biopsy (Figure 1G). In the lamina propria, the average *NOD2* copy  
102 number was 43.1 in controls (normalized arbitrary units). In CD patients, similar values (43.6)  
103 were observed in uninflamed areas whereas *NOD2* expression was increased a 5-fold  
104 (205.907) in the inflamed ileum. On the contrary, the mean values were 4.91 in epithelial cells  
105 of controls and 4.6 in inflamed ileal areas but a 100-fold increase in *NOD2* expression (660)  
106 was detected in uninflamed ileum. Noteworthy, normal Paneth cells had low *NOD2*  
107 expression in controls (1.43). This expression was increased by inflammation and in  
108 heterotopic colonic Paneth cells but *NOD2* was mostly expressed by enterocytes. We thus  
109 concluded that *NOD2* expression is markedly increased in epithelial cells distant from  
110 inflammatory lesions in CD patients.

111

### 112 ***Gut injury leads to epithelial Nod2 expression and cytokine production at remote*** 113 ***sites via CD4<sup>+</sup> T-cell activation.***

114 To confirm the expression of epithelial *Nod2* in healthy areas distant from intestinal  
115 lesions in a mouse model, we treated *Nod2* wild-type (*Nod2*<sup>WT</sup>) mice by an intra-rectal  
116 administration of TNBS. Instillation of TNBS in mice is known to induce a severe

117 inflammation in the distal colon.<sup>14</sup> Interestingly, TNBS has also been shown to alter the  
118 biochemical activity of brush border enzymes (sucrase isomaltase and aminopeptidase),  
119 mucins and cytokines levels in the small bowel (*i.e.* at a significant distance from the gut  
120 injury) without histological lesions.<sup>24</sup> Three days after instillation, mice were sacrificed and  
121 the severity of inflammation was assessed (Figure 2). In the distal colon, TNBS  
122 administration induced a robust inflammation as evidenced by decreased body weight,  
123 increased disease activity index (DAI), reduced colon length and high macroscopic Wallace  
124 damage scores (Figure 2A-D). Consistent with this phenotype, expression levels of TNF- $\alpha$ ,  
125 IFN- $\gamma$  and IL-12 were increased (Figure 2E) at the site of colonic inflammation.

126 We next examined the small bowel but we did not find any overt inflammatory lesion  
127 in the duodenum or ileum (Figure 2F and G) despite increased TNF- $\alpha$ , IFN- $\gamma$  and IL-12  
128 proteins (Figure 2H) and mRNA (Figure 2I) levels. As observed in CD patients, expression of  
129 *Nod2* was increased in the duodenum, ileum and the uninflamed part of the colon remote from  
130 rectal injury (Figure 2I). We hypothesized that this effect was consecutive to the recirculation  
131 of CD4<sup>+</sup> pro-inflammatory T-cells in the gut mucosa. We therefore treated TNBS-challenged  
132 mice with anti-CD4<sup>+</sup> monoclonal antibodies to reduce the number of CD4<sup>+</sup> T-cells in the  
133 small bowel (Figure 2J). This treatment only partially improved the colitis but restored  
134 normal levels of *Nod2* and inflammatory cytokines in the duodenum and ileum (Figure 2A-I).

135 IFN- $\gamma$  and TNF- $\alpha$  increase intestinal paracellular permeability via MLCK activation.  
136 We therefore investigated whether the paracellular permeability of the small bowel was  
137 affected in TNBS treated mice.<sup>25-27</sup> Paracellular permeability as well as long *Mylk* mRNA  
138 expression were increased in both duodenum and ileum but returned to normal after CD4<sup>+</sup> T-  
139 cell depletion (Figures 2I and K). Treatment of mice with an inhibitor of inflammatory CD4<sup>+</sup>  
140 T-cells recirculation (FTY720) limited paracellular permeability increases in the duodenum  
141 and the ileum further indicating that a recirculation of T-cells from the rectal inflammatory  
142 lesions is likely responsible for the remote small bowel barrier loss (Figure 2L).

143 Of note, given the abundance of immune cells in inflamed areas, higher levels of  
144 epithelial NOD2 would be expected in the inflamed bowel of CD patients if the expression of  
145 epithelial *NOD2* was under the control of CD4<sup>+</sup> T-cells. We therefore determined the  
146 populations of immune cells present in the lamina propria of CD patients by immunostaining.  
147 Consistent with data collected in mice, lamina propria CD4<sup>+</sup> T-cell numbers were not  
148 increased in areas with the highest grades of inflammation. Most immune cells present in the  
149 lamina propria at these sites within the ileum (Figures 3A and B) and the colon (Figure 3C and

150 D) were CD163<sup>+</sup> macrophages. Consistently, CD4<sup>+</sup> T-cells predominated in areas with low  
151 grade inflammation.

152

153 ***MLCK activity is necessary to maintain the pro-inflammatory status of the small***  
154 ***intestinal mucosa.***

155 Since pro-inflammatory cytokines such as IL-1 $\beta$ , TNF- $\alpha$  and IFN- $\gamma$  can alter the  
156 paracellular permeability of the intestinal epithelium by increasing the expression and activity  
157 of long MLCK, we explored the role of MLCK in barrier function.<sup>17, 27-30</sup> Treatment of mice  
158 with ML-7 (an inhibitor of MLCK) had only a limited impact on the severity of TNBS-  
159 induced colitis (Figure 4A-E). In contrast, MLCK inhibition restored normal TNF- $\alpha$ , IFN- $\gamma$ ,  
160 IL-1 $\beta$ , IL-12 expression (mRNA and protein), *Mylk* and *Nod2* mRNA transcription, and  
161 paracellular permeability in the duodenum and the ileum (Figures 4F-H). Similarly, knockout  
162 mice lacking long MLCK developed a slightly less severe colitis compared to WT mice  
163 (Figure 4I-L) and did not develop increased duodenal or ileal paracellular permeability  
164 (Figure 4M). These data confirm that MLCK activity is responsible for the gut barrier defect  
165 remote from inflammatory lesions.

166

167 ***NOD2 maintains the barrier integrity on remote small bowel.***

168 We have previously shown that stimulation of epithelial NOD2 with MDP allows the  
169 maintenance of the gut barrier.<sup>17</sup> *Nod2*<sup>WT</sup> mice were treated with MDP for 2 consecutive days  
170 before experimentation. Intraperitoneal injection of rhodamine-labelled MDP confirmed the  
171 ability of MDP to enter the enterocytes (Figures 5A-C). NOD2 stimulation reduced the  
172 disease activity index, colonic length, Wallace damage scores and pro-inflammatory cytokine  
173 expression without any effects on body weight loss after rectal TNBS infusion (Figures 5D-  
174 H). In contrast, in the small bowel, MDP treatment normalized mRNA (Figure 5I) and protein  
175 (Figure 5J) levels of pro-inflammatory cytokines as well as the paracellular permeability  
176 (Figure 5K). As expected, MDP did not affect the increase in *Nod2* expression (Figure 5I).

177 Ablation of *Nod2* in mice (*Nod2*<sup>KO</sup>) results in increased paracellular and transcellular  
178 permeability across Peyer's patches<sup>14, 15</sup> and higher percentages of pro-inflammatory CD4<sup>+</sup> T-  
179 cells<sup>14</sup> but *Nod2*<sup>KO</sup> mice are only slightly more susceptible to TNBS-induced colitis (Figures  
180 6A-D).<sup>14</sup> However, while TNBS-treated *Nod2*<sup>WT</sup> mice exhibit no lesion in the small bowel  
181 (Figure 2F), two thirds of *Nod2*<sup>KO</sup> mice showed overt duodenal inflammatory lesions as  
182 shown by a slight infiltration of scattered neutrophils in the *lamina propria* (Figure 6E and  
183 F). In the ileum, we observed a marked inflammation in 5/8 *Nod2*<sup>KO</sup> mice, an infiltration of

184 neutrophils and mononuclear cells in the villi and the crypts and a loss of muco-secretion. In  
185 addition, *Nod2*<sup>KO</sup> mice exhibited an increased expression of pro-inflammatory cytokines in  
186 the duodenum and the ileum (Figure 6G). In contrast to *Nod2*<sup>WT</sup> mice, treatment with MDP  
187 did not correct the expression of pro-inflammatory cytokines nor the increased permeability in  
188 the intestine of *Nod2*<sup>KO</sup> mice (Figures 7A-F). These findings indicate that the absence of *Nod2*  
189 leads to the development of remote lesions distant to rectal injury.

190 In humans, CD is characterized by gastrointestinal skip lesions. Among the NOD2  
191 genetic polymorphisms associated with CD, the 3020insC mutation encodes for a truncated  
192 (1007fs) protein. As described in *Nod2*<sup>KO</sup> mice, *Nod2*<sup>2939insC</sup> mice -which are homozygotes for  
193 a mutation homologous to the Human 3020insC variant<sup>12</sup> -developed a slightly more severe  
194 colitis after TNBS administration (Figure 6A-D). We observed inflammatory lesions in the  
195 duodenum and ileum of respectively 4/5 and 6/8 *Nod2*<sup>2939insC</sup> mice after TNBS instillation  
196 (Figures 6E and F). Treatment of *Nod2*<sup>2939insC</sup> mice with MDP did not reduce the expression  
197 of pro-inflammatory cytokines and the increased permeability in the small intestine (Figure  
198 7A-F). We thus concluded that mice carrying a CD associated mutation of *NOD2* are not able  
199 to contain the intestinal inflammation where the primitive inflammatory lesions occurred.<sup>12</sup>

200 Since *Nod2*<sup>KO</sup> mice present a microbiota dysbiosis, we studied the contribution of gut  
201 microbiota in the inflammatory phenotype using littermate mice cohoused for 6 weeks.<sup>31-34</sup>  
202 Sharing the dysbiotic microbiota associated with the deletion of *Nod2* in *Nod2*<sup>WT</sup> mice did not  
203 change the severity of TNBS-induced colitis (Figures 7G-H) and the increased paracellular  
204 permeability of the ileal mucosa (Figure 7I). This finding suggests that the microbiota plays  
205 no major role on remote intestinal sites.

206

207 ***Both hematopoietic and non-hematopoietic Nod2 regulate the small bowel function***  
208 ***remote from colonic injury.***

209 NOD2 is detected in intestinal cells of hematopoietic and non-hematopoietic-origins.<sup>35</sup>  
210 To compare the role of hematopoietic vs non-hematopoietic NOD2 in the small bowel during  
211 colitis, we compared *Nod2* chimeric mice after bone marrow stem cell (BMSC) transfer from  
212 *Nod2*<sup>KO</sup> to *Nod2*<sup>WT</sup> mice (KO→WT) and *Nod2*<sup>WT</sup> to *Nod2*<sup>KO</sup> (WT→KO) to control mice  
213 transplanted with BMSC of the same genetic background (WT→WT and KO→KO) (Figures  
214 8A-C).<sup>32</sup> Chimeric mice were then challenged with TNBS three months after BMSC  
215 transplantation. Chimeric mice transplanted with *Nod2*<sup>KO</sup> BMSC were slightly more  
216 susceptible to TNBS-induced colitis than chimeric mice grafted with *Nod2*<sup>WT</sup> BMSC (Figures  
217 8D-H).<sup>17</sup> Indeed, body weight loss, DAI and colonic length were similar between mice



218 receiving WT (WT→WT and WT→KO chimeric mice altogether referred to WT→WT/KO  
219 mice) or *Nod2*<sup>KO</sup> bone marrow (KO→KO and KO→WT chimeric mice referred to  
220 KO→KO/WT mice). However, the Wallace score, IFN- $\gamma$  and TNF- $\alpha$  levels were higher in  
221 colonic inflamed mucosae of chimeric mice receiving *Nod2*<sup>KO</sup> BMSC compared to mice  
222 receiving *Nod2*<sup>WT</sup> BMSC (Figures 8D-H).

223 Interestingly, ablation of *Nod2* in the hematopoietic lineages led to a more frequent  
224 and more severe inflammation in the ileum compared to chimeric mice expressing *Nod2* in  
225 the hematopoietic cells (Figure 8I). In parallel, expression levels of pro-inflammatory  
226 cytokines levels and paracellular permeability were higher in mice deficient for *Nod2* in  
227 BMSC (Figures 8J and K). Consistent with the anti-inflammatory role of NOD2 in the  
228 intestinal mucosa<sup>36</sup>, treatment with MDP improved the colonic inflammation but also the  
229 severity of the small bowel inflammation and the expression in inflammatory cytokines in the  
230 ileum only in chimeric mice expressing *Nod2* in their hematopoietic compartment (Figures  
231 8H-J). However, chimeric mice expressing NOD2 in their radio-resistant compartment  
232 showed reduced paracellular permeability after MDP treatment regardless of the presence of  
233 NOD2 in hematopoietic cells (Figure 8K). This provides additional evidence that both  
234 hematopoietic and non-hematopoietic NOD2 exerts a protective function on the gut barrier.<sup>17</sup>

## 236 Discussion

237 A "leaky gut" is a common feature of several conditions associated with *NOD2*  
238 mutations including CD. Here we show that NOD2 protects the small intestine not only in  
239 injured areas but also in areas remote from gut mucosal lesions. Indeed, NOD2 controls the  
240 paracellular permeability all along the digestive tract to contain the inflammation to local  
241 injuries and prevents its dissemination throughout the intestine.

242 We first observed that NOD2 expression was increased remote from primary  
243 inflammatory lesions in naïve pediatric CD patients. Interestingly, the increase in NOD2  
244 expression was not restricted to immune cells in inflammatory areas as it was also detected in  
245 epithelial cells remote from CD lesions. We therefore hypothesized that epithelial NOD2 may  
246 have a specific role in healthy intestinal areas and explored the intestinal barrier remote from  
247 local injuries in mice.

248 The TNBS-induced colitis is a well-known model of self-limited inflammation.  
249 Although TNBS is administered in the rectum, it also alters the small intestine without any  
250 overt histological lesions in rats suggesting a remote effect of the colitis on the upper

251 intestine.<sup>24, 37</sup> In wild-type mice, we did not find any overt duodenitis or ileitis but we  
252 observed an increase in pro-inflammatory cytokines (TNF- $\alpha$  and IFN- $\gamma$ ) concentration,  
253 intestinal permeability and epithelial *Nod2* expression in the small bowel. These effects were  
254 reversed by anti-CD4<sup>+</sup> antibodies or inhibitor of recirculated CD4<sup>+</sup> T -cells suggesting that  
255 they were consecutive to the recirculation of T-cells activated in the injured mucosa.  
256 Pharmacologic or genetic MLCK inhibition limited permeability increases, indicating that  
257 MLCK activation is a key component of the inflammatory response. Specifically, gut  
258 permeability augmented TNF- $\alpha$  and IFN- $\gamma$  expression and altered lamina propria immune  
259 status.<sup>21</sup> Conversely, pro-inflammatory cytokines increased paracellular permeability by  
260 stimulating MLCK expression and activity.<sup>28, 29</sup>

261 Local colonic injury leads to the disruption of the small bowel barrier. Since *Nod2* is  
262 known to protect the gut barrier by inhibiting MLCK<sup>15</sup> and because it was over-expressed in  
263 the small intestine, we supposed that it could restrain the leaky gut phenotype to the injured  
264 mucosa. MDP-induced activation of *Nod2* fully corrected the impairment of the small bowel  
265 indicating that *Nod2* plays a protective role along the small bowel. Recirculation of activated  
266 T-cells increases the gut permeability but also induces NOD2 expression which, in turn,  
267 strengthens the gut barrier. Interestingly, NOD2 seems to have little effect on the colitis itself.  
268 The severity of the inflammation may thus limit the effect of *Nod2*.

269 In contrast to WT mice, *Nod2*-deficient or mutated mice developed overt  
270 inflammatory lesions in the small bowel during TNBS-induced colitis, thus confirming the  
271 relevance of NOD2 in the protection of the gut barrier. Using BMSC transfer experiments  
272 (from *Nod2*<sup>WT</sup> to *Nod2*<sup>KO</sup> mice and vice-versa), we showed that both hematopoietic and non-  
273 hematopoietic NOD2 are necessary to protect the small bowel mucosa.

274 To the best of our knowledge, the role of NOD2 remote to colonic inflammation had  
275 never been demonstrated. In CD, Th-1 oriented CD4<sup>+</sup> T cells appear to be key effectors of gut  
276 inflammation and NOD2 expression<sup>38</sup> and most treatments (anti-inflammatory drugs,  
277 immune-suppressors and anti-TNF- $\alpha$  antibodies) target CD4<sup>+</sup> T cells. For instance, TNF- $\alpha$   
278 antagonists diminish the severity of the disease and restore the gut barrier function.<sup>22, 39</sup> In our  
279 model, *Nod2* invalidation in the hematopoietic compartment is sufficient to promote a barrier  
280 defect which is consistent with reported cases of CD patients cured by allogenic or autologous  
281 hematopoietic stem cell transplantation.<sup>40</sup> However, activation of epithelial NOD2 may also  
282 counteract the effect of IFN- $\gamma$  and TNF- $\alpha$  suggesting that treatment of patients not carrying  
283 mutations in *NOD2* with NOD2 agonists could activate the negative feedback loop to prevent  
284 the propagation of the inflammation and the skip lesions defining CD.<sup>41</sup>

285

## 286 **Material and Methods**

### 287 **Patients and biopsies.**

288 Intestinal biopsies were obtained from 17 untreated children during routine endoscopies  
289 performed to establish CD diagnosis. Controls were histologically normal digestive biopsies  
290 obtained from 5 children without inflammatory bowel disease. For each participant, one or  
291 two biopsies from the ileum and/or cecum were sampled. Biopsies were either immediately  
292 frozen and later stained with toluidine blue or fixed in 4%-phosphate-buffered formalin and  
293 stained with hematoxylin and eosin. All biopsies were graded histologically so that  
294 immunohistochemistry and laser microdissection could be correlated with disease severity.  
295 NOD2 immunostaining was performed as previously described with two different rabbit  
296 polyclonal antibodies (Cayman Chemical and a gift from G Thomas CEPH).<sup>23</sup> Laser  
297 microdissection was performed on 7µm sections obtained from the frozen biopsies. After  
298 verification of the quality of tissues and the absence of ulcers, surface epithelial cells and  
299 lamina propria cells were laser-microdissected using a Leica<sup>R</sup> AS LMD system (Leica  
300 microsystems) in less than one hour. A mean of 500 cells were microdissected from each of  
301 the specimens (range 100-1000 cells) and stored in Trizol<sup>R</sup> reagent (Invitrogen, Groningen,  
302 The Netherlands). The study was approved by the ethic committee “de protection des  
303 personnes” (Saint Louis Hospital, Paris, France) and all the parents of participants provided a  
304 signed informed consent.

### 305 **Animal models.**

306 Housing and experiments were conducted according to institutional animal healthcare  
307 guidelines and were approved by the local ethical committee for animal experimentation  
308 (Comité Régional d’Ethique en matière d’Expérimentation Animale no. 4, Paris, France).  
309 C57BL/6 wild-type (WT), *Nod2* null allele (*Nod2*<sup>KO</sup>) and *Nod2*<sup>2939insC</sup> mice (homozygotes for  
310 a mutation homologous to the Human 3020insC variant) together with long *MLCK* deficient  
311 mice (*MLCK*<sup>KO</sup>) were generated or hosted in a pathogen free animal facility.<sup>12, 14, 26</sup> The  
312 animal facility was monitored every six months in accordance with the full set of FELASA  
313 high standard recommendations. The putative impact of *Nod2*-related dysbiosis on the studied  
314 phenotypes was assessed using WT and *Nod2*<sup>KO</sup> mice cohoused for 6 weeks in the same cage  
315 where indicated.<sup>33, 42</sup>

316 For the construction of chimeric mice, five million bone marrow stem cells (BMSC)  
317 were isolated from WT Ly5.1 or *Nod2*<sup>KO</sup> Ly5.2 mice and injected intravenously either into

318 WT Ly5.1 or *Nod2*<sup>KO</sup>Ly5.2 lethally-irradiated recipients.<sup>30, 32</sup> Chimerism was verified at  
319 week 12 by flow cytometry using Ly5.1 and Ly5.2 congenic markers (Figure 8A-C).<sup>35</sup>

320 CD4<sup>+</sup> T-cells were depleted by two intra-peritoneal (i.p.) injections of 100µg purified  
321 GK1.5 (anti-L3T4 (CD4<sup>+</sup>) monoclonal antibody (Pharmingen, Germany), 96 and 24 hours  
322 before experimentation and 24hours after TNBS administration.<sup>15</sup> The effectiveness of CD4 +  
323 depletion in Peyer's plates is shown in Figure 2J. To inhibit the recirculation of CD4<sup>+</sup> T-cells,  
324 mice were treated i.p. with FTY720 (3mg/kg; Sigma, France)<sup>43</sup> 0, 1, 2 and 3 days after TNBS  
325 infusion.

326 MLCK inhibition was achieved by ip injection of ML-7, 2 mg/kg body weight (Sigma,  
327 France) twice daily during 4 days before experiments and 24 hours after TNBS  
328 administration.<sup>15</sup> To investigate the effect of Nod2 stimulation, adult mice were pre-treated i.p  
329 with muramyl dipeptide (MDP, 100µg/mice/day; Sigma, France) for 2 consecutive days  
330 before experimentation and 24 hours after TNBS administration.<sup>35</sup>

### 331 **Colitis induction.**

332 Colitis was induced in 12 weeks old mice by a single intra-rectal administration of  
333 2,4,6-trinitrobenzene sulfonic acid (TNBS, Sigma, France), which was dissolved in ethanol  
334 (50:50 vol/vol) at a dose of 120 mg/kg body weight under anaesthesia. Groups used as  
335 controls (vehicle) received an equal volume of PBS and Ethanol (50:50 vol/vol) intra-rectally.  
336 A 100 µl aliquot of the freshly prepared solution was injected into the colon, 4 cm from the  
337 anus, using a 3.5 F polyethylene catheter as previously described.<sup>14</sup> Body weight loss and  
338 disease activity index were monitored before and 72h after TNBS administration. Mice were  
339 sacrificed by cervical dislocation. Colonic length and macroscopic damage Wallace score  
340 were recorded.<sup>44</sup>

341 Duodenal and ileal samples were fixed in 4%-phosphate-buffered formalin and  
342 embedded in paraffin. Five-micrometer sections were cut and stained with hematoxylin and  
343 eosin. Grading of the inflammatory scores were performed in blind fashion according the follow  
344 criteria<sup>45</sup>: 0, no sign of inflammation; 1, very low level of leukocyte infiltration; 2, low level  
345 of leukocyte infiltration; 3, high level of leukocyte infiltration, high vascular density, and  
346 thickening of the colon wall; 4, transmural infiltration, loss of goblet cells, high vascular  
347 density, and thickening of the colon wall in less than half of circumference ; 5 necrosis of  
348 more than half the circumference and transmural inflammation.

349 Myeloperoxidase (MPO) expression was detected by immunohistochemistry. All  
350 sections were deparaffinized in xylene, rehydrated, incubated in 3% hydrogen peroxide for  
351 endogenous peroxidase removal, and heated for 10 minutes in sub-boiling 10 mM citrate

352 buffer (pH 6.0) for antigen retrieval. Then, sections were processed using the ImmPRESS  
353 polymer detection systems & reagents (Vector Laboratories, Burlingame, Ca), using anti-  
354 MPO antibody (Abcam, Cambridge, UK).

#### 355 **Muramyl dipeptide localization.**

356 Mice were injected intraperitoneally with 300µg of rhodamine-labeled muramyl  
357 dipeptide (MDP, InvivoGen, San Diego, CA). Two hours later, mice were anesthetized with  
358 isofurane (Centre Spécialités Pharmaceutiques, Mousse-le-Neuf, France) and sacrificed. Ileal  
359 and duodenal samples were collected and rinsed with ice-cold PBS (ThermoFisher, Waltham,  
360 MA). Tissue was frozen in liquid nitrogen using HistoLab OCT cryomount (Histolab,  
361 Gothengurg, Sweden), 10µm-thick cryosections were cut and then fixed in 4% PFA. MDP-  
362 rhodamine localization was detected by fluorescence confocal microscopy (confocal sp8,  
363 Leica, Frankfurt am Main, Germany).

#### 364 **Paracellular permeability measurement.**

365 To measure the intestinal permeability, biopsies from duodenal and ileal mucosa were  
366 mounted in a Ussing chamber exposing 0.196 cm<sup>2</sup> of tissue surface to 1.5ml of circulating  
367 oxygenated Ringer solution at 37°C. Paracellular permeability was assessed by measuring the  
368 mucosal-to-serosal flux of 4 kDa FITC-dextran (Sigma, France).<sup>30</sup>

#### 369 **ELISA.**

370 Biopsies of duodenum, ileum and colon from different mice models were collected  
371 and washed with cold PBS. These biopsies were then homogenized using an ultra-thurax in 1  
372 ml of PBS1X and, the concentration of protein was determined using commercial kit (Biorad,  
373 Marnes la Coquette, France). IFN-γ, IL-1β, IL-12 and TNF-α protein levels in the intestine  
374 were determined by ELISA according to manufacturer's instructions (BD Biosciences).<sup>46</sup>

#### 375 **DNA extraction and real time quantitative PCR.**

376 After extraction by the NucleoSpin RNA II Kit (Macherey-Nagel, France), total RNAs  
377 were converted to cDNA using random hexonucleotides and then used for RT-PCR  
378 (Invitrogen). We conducted qPCR with QuantiTect SYBR Green PCR Kit (Applied, France)  
379 using sense and antisense primers specific for G3PDH, the long MLCK isoform (specifically  
380 expressed by epithelial cells), *Ifn-γ*, *Il-1β*, *Il-12*, *NOD2*, *Mylk* and *Tnf-α* (primers used  
381 available in table 1). The cycle threshold (Ct) was defined as the number of cycles at which  
382 the normalized fluorescent intensity passed the level of 10 times the standard deviations of the  
383 baseline emission calculated on the first 10 PCR cycles. Results are expressed as 2<sup>-ΔΔCt</sup> as  
384 previously described.<sup>33</sup> For RNA samples obtained by laser microdissection, NOD2  
385 expression was measured in triplicate and normalized using the Abelson housekeeping gene.

386 To derive a relative number of mRNA molecules, a titration curve was established with  
387 NOD2 plasmids (from 1 to 10<sup>6</sup> copy/microliters).

388 **Statistical analysis.**

389 For all the analysis, multigroup comparisons were performed using one-way ANOVA  
390 statistics with Bonferroni correction for multiple comparisons where an unpaired t-test  
391 assuming the Gaussian distribution was applied. The Gaussian distribution was tested by the  
392 Kolmogorov-Smirnov test. Statistical analyzes were performed using GraphPad Prism 7.00  
393 (GraphPad Software). A two-sided P-value < 0.05 was considered statistically significant. All  
394 authors reviewed the data and approved the final manuscript.

395

396 **Acknowledgements.**

397 We thank Latifa Ferkdadji, Michel Peuchmaur, Xavier Fund, Anh Thu Gaston,  
398 Guillaume Even and Céline Berraud for their support and assistance. Financial support was  
399 provided by INSERM, Université Paris Diderot, Assistance Publique Hopitaux de Paris,  
400 Association François Aupetit and Investissements d’Avenir programme ANR-11-IDEX-0005-  
401 02, Sorbonne Paris Cite, Laboratoire d’excellence INFLAMEX and NIH grant NIDDK  
402 DK061931/DK068271.

403

404 **Author contributions:**

405 Study design and concept: ZA, DB, HZ, FB, JPH; Data acquisition: ZA, DB, CMV, NM, CM,  
406 MR, MD, HZ, CJ, FB; Analysis and interpretation: ZA, DB, CMV, NM, GD, JRT, CM, MR,  
407 NCB, CJ, FB, JPH; Writing of the manuscript: ZA, GD, JRT, NCB, FB, JPH; Obtained  
408 funding: JPH; Technical support: DB, CMV, GS, GD, NM, CM, MR, EOD, MD, CJ; Study  
409 supervision: DB, FB, JPH.

410

411 **Authors have no conflict of interest to declare.**

412

413

## References.

1. Treton X, Pedruzzi E, Guichard C, Ladeiro Y, Sedghi S, Vallee M, Fernandez N, Bruyere E, Woerther PL, Ducroc R, Montcuquet N, Freund JN, Van Seuningen I, Barreau F, Marah A, Hugot JP, Cazals-Hatem D, Bouhnik Y, Daniel F, Ogier-Denis E. Combined nadph oxidase 1 and interleukin 10 deficiency induces chronic endoplasmic reticulum stress and causes ulcerative colitis-like disease in mice. *PLoS One* 2014;9:e101669.
2. Thachil E, Hugot JP, Arbeille B, Paris R, Grodet A, Peuchmaur M, Codogno P, Barreau F, Ogier-Denis E, Berrebi D, Viala J. Abnormal activation of autophagy-induced crinophagy in paneth cells from patients with crohn's disease. *Gastroenterology* 2012.
3. Khor B, Gardet A, Xavier RJ. Genetics and pathogenesis of inflammatory bowel disease. *Nature* 2011;474:307-17.
4. Hugot JP, Chamaillard M, Zouali H, Lesage S, Cezard JP, Belaiche J, Almer S, Tysk C, O'Morain CA, Gassull M, Binder V, Finkel Y, Cortot A, Modigliani R, Laurent-Puig P, Gower-Rousseau C, Macry J, Colombel JF, Sahbatou M, Thomas G. Association of nod2 leucine-rich repeat variants with susceptibility to crohn's disease. *Nature* 2001;411:599-603.
5. Ogura Y, Bonen DK, Inohara N, Nicolae DL, Chen FF, Ramos R, Britton H, Moran T, Karaliuskas R, Duerr RH, Achkar JP, Brant SR, Bayless TM, Kirschner BS, Hanauer SB, Nunez G, Cho JH. A frameshift mutation in nod2 associated with susceptibility to crohn's disease. *Nature* 2001;411:603-6.
6. Lesage S, Zouali H, Cezard JP, Colombel JF, Belaiche J, Almer S, Tysk C, O'Morain C, Gassull M, Binder V, Finkel Y, Modigliani R, Gower-Rousseau C, Macry J, Merlin F, Chamaillard M, Jannot AS, Thomas G, Hugot JP. Card15/nod2 mutational analysis and genotype-phenotype correlation in 612 patients with inflammatory bowel disease. *Am J Hum Genet* 2002;70:845-57.
7. Al Nabhani Z, Dietrich G, Hugot JP, Barreau F. Nod2: The intestinal gate keeper. *PLoS Pathog* 2017;13:e1006177.
8. Inohara N, Nunez G. Nods: Intracellular proteins involved in inflammation and apoptosis. *Nat Rev Immunol* 2003;3:371-82.
9. Watanabe T, Kitani A, Murray PJ, Strober W. Nod2 is a negative regulator of toll-like receptor 2-mediated t helper type 1 responses. *Nat Immunol* 2004;5:800-8.
10. Kobayashi KS, Chamaillard M, Ogura Y, Henegariu O, Inohara N, Nunez G, Flavell RA. Nod2-dependent regulation of innate and adaptive immunity in the intestinal tract. *Science* 2005;307:731-4.
11. Eckmann L, Karin M. Nod2 and crohn's disease: Loss or gain of function? *Immunity* 2005;22:661-7.
12. Maeda S, Hsu LC, Liu H, Bankston LA, Iimura M, Kagnoff MF, Eckmann L, Karin M. Nod2 mutation in crohn's disease potentiates nf-kappab activity and il-1beta processing. *Science* 2005;307:734-8.
13. Buhner S, Buning C, Genschel J, Kling K, Herrmann D, Dignass A, Kuechler I, Krueger S, Schmidt HH, Lochs H. Genetic basis for increased intestinal permeability in families with crohn's disease: Role of card15 3020insc mutation? *Gut* 2006;55:342-7.
14. Barreau F, Meinzer U, Chareyre F, Berrebi D, Niwa-Kawakita M, Dussailant M, Foligne B, Ollendorff V, Heyman M, Bonacorsi S, Lesuffleur T, Sterkers G, Giovannini M, Hugot JP. Card15/nod2 is required for peyer's patches homeostasis in mice. *PLoS One* 2007;2:e523.

15. Barreau F, Madre C, Meinzer U, Berrebi D, Dussailant M, Merlin F, Eckmann L, Karin M, Sterkers G, Bonacorsi S, Lesuffleur T, Hugot JP. Nod2 regulates the host response towards microflora by modulating t cell function and epithelial permeability in mouse peyer's patches. *Gut* 2010;59:207-17.
16. Barreau F, Hugot J. Intestinal barrier dysfunction triggered by invasive bacteria. *Curr Opin Microbiol* 2014;17C:91-98.
17. Al Nabhani Z, Montcuquet N, Roy M, Dussailant M, Hugot JP, Barreau F. Complementary roles of nod2 in hematopoietic and nonhematopoietic cells in preventing gut barrier dysfunction dependent on mlck activity. *Inflamm Bowel Dis* 2017;23:1109-1119.
18. Blair SA, Kane SV, Clayburgh DR, Turner JR. Epithelial myosin light chain kinase expression and activity are upregulated in inflammatory bowel disease. *Lab Invest* 2006;86:191-201.
19. Reikvam DH, Perminow G, Lyckander LG, Gran JM, Brandtzaeg P, Vatn M, Carlsen HS. Increase of regulatory t cells in ileal mucosa of untreated pediatric crohn's disease patients. *Scand J Gastroenterol* 2011;46:550-60.
20. Parronchi P, Romagnani P, Annunziato F, Sampognaro S, Becchio A, Giannarini L, Maggi E, Pupilli C, Tonelli F, Romagnani S. Type 1 t-helper cell predominance and interleukin-12 expression in the gut of patients with crohn's disease. *Am J Pathol* 1997;150:823-32.
21. Su L, Shen L, Clayburgh DR, Nalle SC, Sullivan EA, Meddings JB, Abraham C, Turner JR. Targeted epithelial tight junction dysfunction causes immune activation and contributes to development of experimental colitis. *Gastroenterology* 2009;136:551-63.
22. Suenart P, Bulteel V, Lemmens L, Noman M, Geypens B, Van Assche G, Geboes K, Ceuppens JL, Rutgeerts P. Anti-tumor necrosis factor treatment restores the gut barrier in crohn's disease. *Am J Gastroenterol* 2002;97:2000-4.
23. Berrebi D, Maudinas R, Hugot JP, Chamaillard M, Chareyre F, De Lagausie P, Yang C, Desreumaux P, Giovannini M, Cezard JP, Zouali H, Emilie D, Peuchmaur M. Card15 gene overexpression in mononuclear and epithelial cells of the inflamed crohn's disease colon. *Gut* 2003;52:840-6.
24. Barada KA, Mourad FH, Sawah SI, Khoury C, Safieh-Garabedian B, Nassar CF, Saade NE. Localized colonic inflammation increases cytokine levels in distant small intestinal segments in the rat. *Life Sci* 2006;79:2032-42.
25. Zolotarevsky Y, Hecht G, Koutsouris A, Gonzalez DE, Quan C, Tom J, Mrsny RJ, Turner JR. A membrane-permeant peptide that inhibits mlc kinase restores barrier function in in vitro models of intestinal disease. *Gastroenterology* 2002;123:163-72.
26. Clayburgh DR, Barrett TA, Tang Y, Meddings JB, Van Eldik LJ, Watterson DM, Clarke LL, Mrsny RJ, Turner JR. Epithelial myosin light chain kinase-dependent barrier dysfunction mediates t cell activation-induced diarrhea in vivo. *J Clin Invest* 2005;115:2702-15.
27. Wang F, Graham WV, Wang Y, Witkowski ED, Schwarz BT, Turner JR. Interferon-gamma and tumor necrosis factor-alpha synergize to induce intestinal epithelial barrier dysfunction by up-regulating myosin light chain kinase expression. *Am J Pathol* 2005;166:409-19.
28. Al-Sadi R, Ye D, Dokladny K, Ma TY. Mechanism of il-1beta-induced increase in intestinal epithelial tight junction permeability. *J Immunol* 2008;180:5653-61.
29. Wang F, Schwarz BT, Graham WV, Wang Y, Su L, Clayburgh DR, Abraham C, Turner JR. Ifn-gamma-induced tnfr2 expression is required for tnf-dependent intestinal epithelial barrier dysfunction. *Gastroenterology* 2006;131:1153-63.



30. Jung C, Meinzer U, Montcuquet N, Thachil E, Chateau D, Thiebaut R, Roy M, Alnabhani Z, Berrebi D, Dussaillant M, Pedruzzi E, Thenet S, Cerf-Bensussan N, Hugot JP, Barreau F. *Yersinia pseudotuberculosis* disrupts intestinal barrier integrity through hematopoietic tlr-2 signaling. *J Clin Invest* 2012;122:2239-51.
31. Mondot S, Barreau F, Al Nabhani Z, Dussaillant M, Le Roux K, Dore J, Leclerc M, Hugot JP, Lepage P. Altered gut microbiota composition in immune-impaired nod2(-/-) mice. *Gut* 2012;61:634-5.
32. Alnabhani Z, Hugot JP, Montcuquet N, Le Roux K, Dussaillant M, Roy M, Leclerc M, Cerf-Bensussan N, Lepage P, Barreau F. Respective roles of hematopoietic and nonhematopoietic nod2 on the gut microbiota and mucosal homeostasis. *Inflamm Bowel Dis* 2016;22:763-73.
33. Al Nabhani Z, Lepage P, Mauny P, Montcuquet N, Roy M, Le Roux K, Dussaillant M, Berrebi D, Hugot JP, Barreau F. Nod2 deficiency leads to a specific and transmissible mucosa-associated microbial dysbiosis which is independent of the mucosal barrier defect. *J Crohns Colitis* 2016;10:1428-1436.
34. Couturier-Maillard A, Secher T, Rehman A, Normand S, De Arcangelis A, Haesler R, Huot L, Grandjean T, Bressenot A, Delanoye-Crespin A, Gaillot O, Schreiber S, Lemoine Y, Ryffel B, Hot D, Nunez G, Chen G, Rosenstiel P, Chamaillard M. Nod2-mediated dysbiosis predisposes mice to transmissible colitis and colorectal cancer. *J Clin Invest* 2013.
35. Alnabhani Z, Montcuquet N, Biaggini K, Dussaillant M, Roy M, Ogier-Denis E, Madi A, Jallane A, Feuilloley M, Hugot JP, Connil N, Barreau F. *Pseudomonas fluorescens* alters the intestinal barrier function by modulating il-1beta expression through hematopoietic nod2 signaling. *Inflamm Bowel Dis* 2015;21:543-55.
36. Brain O, Owens BM, Pichulik T, Allan P, Khatamzas E, Leslie A, Steevels T, Sharma S, Mayer A, Catuneanu AM, Morton V, Sun MY, Jewell D, Coccia M, Harrison O, Maloy K, Schonefeldt S, Bornschein S, Liston A, Simmons A. The intracellular sensor nod2 induces microrna-29 expression in human dendritic cells to limit il-23 release. *Immunity* 2013;39:521-36.
37. Amit-Romach E, Reifen R, Uni Z. Mucosal function in rat jejunum and ileum is altered by induction of colitis. *Int J Mol Med* 2006;18:721-7.
38. Strober W, Fuss IJ. Proinflammatory cytokines in the pathogenesis of inflammatory bowel diseases. *Gastroenterology* 2011;140:1756-67.
39. Brown GR, Lindberg G, Meddings J, Silva M, Beutler B, Thiele D. Tumor necrosis factor inhibitor ameliorates murine intestinal graft-versus-host disease. *Gastroenterology* 1999;116:593-601.
40. Leung Y, Geddes M, Storek J, Panaccione R, Beck PL. Hematopoietic cell transplantation for crohn's disease; is it time? *World J Gastroenterol* 2006;12:6665-73.
41. Rosenstiel P, Fantini M, Brautigam K, Kuhbacher T, Waetzig GH, Seegert D, Schreiber S. Tnf-alpha and ifn-gamma regulate the expression of the nod2 (card15) gene in human intestinal epithelial cells. *Gastroenterology* 2003;124:1001-9.
42. Robertson SJ, Zhou JY, Geddes K, Rubino SJ, Cho JH, Girardin SE, Philpott DJ. Nod1 and nod2 signaling does not alter the composition of intestinal bacterial communities at homeostasis. *Gut Microbes* 2013;4:222-31.
43. Daniel C, Sartory N, Zahn N, Geisslinger G, Radeke HH, Stein JM. Fty720 ameliorates th1-mediated colitis in mice by directly affecting the functional activity of cd4+cd25+ regulatory t cells. *J Immunol* 2007;178:2458-68.
44. Wallace JL, Keenan CM. An orally active inhibitor of leukotriene synthesis accelerates healing in a rat model of colitis. *Am J Physiol* 1990;258:G527-34.

45. Neurath MF, Fuss I, Kelsall BL, Stuber E, Strober W. Antibodies to interleukin 12 abrogate established experimental colitis in mice. *J Exp Med* 1995;182:1281-90.
46. Meinzer U, Barreau F, Esmiol-Welterlin S, Jung C, Villard C, Leger T, Ben-Mkaddem S, Berrebi D, Dussailant M, Alnabhani Z, Roy M, Bonacorsi S, Wolf-Watz H, Perroy J, Ollendorff V, Hugot JP. *Yersinia pseudotuberculosis* effector yopj subverts the nod2/rick/tak1 pathway and activates caspase-1 to induce intestinal barrier dysfunction. *Cell Host Microbe* 2012;11:337-51.

### Figures legend.

#### Figure 1: NOD2 expression is increased in intestinal mucosa of Crohn disease patients.

(A-F) Biopsies from controls (A and D) and naïve pediatric CD patients (B, C, E and F) were immunostained with anti-NOD2 antibodies. Ileal (A-C) or cecal (D-F) biopsies were obtained from inflamed (C and F) or uninfamed areas (B and E). Data shown are representative of 5 controls and 17 CD patients. (G) Number of *NOD2* mRNA copies were normalized by the expression of *Abelson* gene and expressed as arbitrary units. mRNA levels were calculated for the epithelial monolayer (in blue) and the lamina propria (in red) from the same biopsy after laser microdissection. Biopsies were obtained from inflamed or uninfamed intestinal areas and referenced by an arbitrary number.

#### Figure 2: Remote gut barrier dysfunctions of the small intestine are mediated by recirculating CD4<sup>+</sup> T-cells.

(A-L) C57BL/6 wild-type mice (*Nod2*<sup>WT</sup>) were instilled intra-rectally with TNBS. Vehicle control group was challenged by PBS-Ethanol. Mice were treated with anti-CD4<sup>+</sup> antibodies or FTY720, an inhibitor of T-cell recirculation where indicated. 3 days after the instillation, the intensity of the colitis was monitored with the following parameters: (A) Weight loss; (B) Disease activity index; (C) Colonic length (cm); (D) Colonic macroscopic score (Wallace score); (E) Pro-inflammatory cytokine levels in inflamed colon. In parallel, the duodenum and ileum were explored by microscopic examination after (F) hematoxylin-eosin staining and (G) Myeloperoxidase (MPO) immunostaining (colonic MPO expression in a mouse treated with DSS 3% for 7 days is shown as a positive inflammatory control); (H) Protein levels of pro-inflammatory cytokines; (I) mRNA expressions of pro-inflammatory cytokines, *Mlyk* and *Nod2*; (J) levels of CD4<sup>+</sup> T-cells in ileal Peyer's patches after CD4<sup>+</sup> depletion with anti-CD4<sup>+</sup> antibodies; (K-L) Paracellular permeability assessed by Ussing chamber experiments. Original magnification, X20. Scale bars: 100µM. (Each point = one mice ; mean±s.e.m; 3 independent experiments; \*P<0.05, \*\*P<0.01 and \*\*\*P<0.001 vs. vehicle control group or indicated group; ++P<0.01 vs. TNBS group).

**Figure 3: CD4 and CD163 immunostaining of ileal and colonic biopsies from CD patients.**

(A-B) Ileal and (C-D) colonic biopsies were collected from uninflamed or inflamed locations in CD patients. (A and C) Grading of the inflammation was confirmed by coloration by hematoxylin-eosin (HES) and CD4<sup>+</sup> or CD163<sup>+</sup> positive cells were assessed by immunostaining. (B and D) CD4<sup>+</sup> or CD163<sup>+</sup> positive cells were counted in the lamina propria. (At least n=6 fields per patients; mean ± SEM; \*P<0.05 vs. uninflamed CD4<sup>+</sup> T-cells; <sup>+</sup>P<0.05 and <sup>+++</sup>P<0.001 vs. uninflamed CD163<sup>+</sup> T-cells). Areas with lymphoid follicles were excluded.

**Figure 4: Inhibition of MLCK prevents the small bowel alteration triggered by TNBS induced colitis.**

(A-M) Colitis was induced by intra-rectal administration of TNBS in (A-H) wild-type (WT) mice or (I-M) long isoform MLCK knock-out (MLCK<sup>KO</sup>) mice while the control group was challenged with PBS-Ethanol. Mice were treated with ML-7, an MLCK inhibitor, or PBS (Vehicle) where indicated. 3 days after induction of colitis, the following parameters were monitored to evaluate the severity of the colitis : (A,I) Weight loss and (B,J) Disease activity index; (C,K) Colonic length; (D,L) Wallace score; (E) Levels of pro-inflammatory cytokine in inflamed colon. In parallel, the following parameters were measured in the duodenum and ileum: (F) protein levels and; (G) mRNA expression of pro-inflammatory cytokines, *Mylk* and *Nod2*; (H,M) Paracellular permeability. (One point = one mouse; mean ± s.e.m; 3 independent experiments; \*P<0.05, \*\*P<0.01 and \*\*\*P<0.001 vs. vehicle control group or indicated group; <sup>++</sup>P<0.01 vs. TNBS group; ns=non-significant).

**Figure 5: NOD2 activation reverses the remote effects of TNBS-induced colitis.**

(A-C) Localization of muramyl dipeptide (MDP) in the small intestine after intraperitoneal injection. Rhodamine-labeled MDP is detected in epithelial cells of the small intestine two hours after IP injection. Fluorescence (red) was detected in epithelial cells of the (B) duodenum and (C) ileum. Nuclei were stained with DAPI (blue). (A) The ileum of a mouse injected with distilled water was used as a negative control. Original magnification, X40. Scale bars: 100µM. (D-K) C57BL/6 wild-type mice were instilled intra-rectally with TNBS. Vehicle control group was challenged with PBS-Ethanol. Mice were treated with MDP where indicated. 3 days after induction, the colitis was monitored by the following parameters: (D) Disease activity index; (E) Colonic length; (F) Wallace score; (G) levels of pro-inflammatory

cytokines in inflamed colon; (H) Weight loss. In parallel, the following measures were made in the duodenum and ileum: (I) mRNA expression of pro-inflammatory cytokines, *Myk* and *Nod2*; (J) protein expression of pro-inflammatory cytokines; (K) Paracellular permeability. (Each point = one mouse; mean  $\pm$  s.e.m; 3 independent experiments; \*P<0.05, \*\*P<0.01 and \*\*\*P<0.001 vs. vehicle group or indicated group; +P<0.05, ++P<0.01 and +++P<0.001 vs. TNBS vehicle group).

**Figure 6: TNBS induced colitis leads to small bowel inflammation in *Nod2* deficient or mutated mice.**

(A-F) *Nod2*<sup>WT</sup>, *Nod2*<sup>KO</sup> and *Nod2*<sup>2939insC</sup> mice were challenged by intra-rectal instillation of TNBS. 3 days after induction, the colitis was monitored with the following parameters: (A) Weight loss; (B) Disease activity index; (C) Colonic length; (D) Wallace score. In parallel, the duodenum and ileum were studied by: (E and F) microscopic examination after hematoxylin-eosin staining; (G) protein levels of pro-inflammatory cytokines. (One point = one mouse; mean  $\pm$  s.e.m; 3 independent experiments; \*\*P<0.01 and \*\*\*P<0.001 vs. Vehicle group; ++P<0.01 vs. indicated group; ns=non-significant).

**Figure 7: The small bowel is not protected by muramyl dipeptide in *Nod2* deficient mice. The gut microbiota does not play a major role.**

(A-E) *Nod2*<sup>WT</sup>, *Nod2*<sup>KO</sup> and *Nod2*<sup>2939insC</sup> mice were challenged by intra-rectal instillation of TNBS. Mice were treated with muramyl dipeptide (MDP) or PBS (vehicle) where indicated. (A) Disease activity index; (B) Colonic length; (C) Wallace score; Levels of pro-inflammatory cytokine in the (D) colon or (E) small bowel. (F) paracellular permeability in the small bowel. (G-I). *Nod2*<sup>WT</sup> and *Nod2*<sup>KO</sup> mice were left separated or co-housed for at least 6 weeks to homogenize their microbiota. 3 days after TNBS-colitis induction, the following parameters were monitored: (G) Colonic length; (H) Colonic macroscopic score (Wallace score) and; (I) ileal Paracellular permeability (One point = one mouse; mean  $\pm$  s.e.m; 3 independent experiments; \*P<0.05 and \*\*P<0.01 vs. indicated group; +P<0.05, ++P<0.05 and +++P<0.001 vs. instilled TNBS *Nod2*<sup>WT</sup> group).

**Figure 8: Both hematopoietic and non-hematopoietic *Nod2* regulate the small bowel function remote from gut injury.**

(A-C) Chimeric mice were generated by transplantation of BMSC mice from *Nod2*<sup>WT</sup> to

$Nod2^{KO}$  (WT→KO) or from  $Nod2^{KO}$  to  $Nod2^{WT}$  (KO→WT). Mice transplanted with BMSC of the same genetic background (WT→WT or KO→KO) served as controls. Where indicated WT→KO and WT→WT (respectively KO→WT and KO→KO) were pooled and annotated WT→WT/KO (respectively KO→WT/KO). Three months after bone marrow transplantation, chimerism for CD45 isoforms expression was monitored in Peyer's patches of chimeric mice via flow cytometry. (A) Percentages of CD45.1 and CD45.2 positive cells. (B and C) Percentages of CD3<sup>+</sup>, CD19<sup>+</sup> and CD11c<sup>+</sup> cells in CD45Ly5.1 or CD45Ly5.2 respectively. (D-K) Three month after transplantation, colitis was induced by intra-rectal administration of TNBS. Mice were treated with MDP or PBS (vehicle) where indicated. 3 days after induction of colitis, the following parameters were monitored: (D) Weight loss; (E) Disease activity index; (F) Wallace score; (G) colonic length; (H) levels of pro-inflammatory cytokines in inflamed colon. In the ileum, the following parameters were recorded in parallel: (I) microscopic score; (J) Levels of pro-inflammatory cytokines and; (K) Paracellular permeability. (At least n=6 per group; mean ± s.e.m; data show a combination of two independent experiments; \*P<0.05, \*\*P<0.01 and \*\*\*P<0.001 vs. indicated group; <sup>+</sup>P<0.05, <sup>++</sup>P<0.01 and <sup>+++</sup>P<0.001 vs. instilled TNBS control group; ns=non-significant).

Table 1. List of primers used for qPCR analyses in mice.

| mRNA              | Sense                            | Antisense                     |
|-------------------|----------------------------------|-------------------------------|
| long MLCK isoform | 5'-ACATGCTACTGAGTGGCCTCTCT-3'    | 5'GGCAGACAGGACATTGTTTAAGG-3'  |
| IL-1 $\beta$      | 5'-CAACCAACAAGTGATATTCTCCATG-3'  | 5'- GATCCACACTCTCCAGCTGCA-3'  |
| IL-12             | 5'-ACGAGAGTTGCCTGGCTACTAG-3'     | 5'-CCTCATAGATGCTACCAAGGCAC-3' |
| IFN- $\gamma$     | 5'-CAGCAACAGCAAGGCGAAAAAGG-3'    | 5'-TTTCCGCTTCCTGAGGCTGGAT-3'  |
| TNF- $\alpha$     | 5'-CATCTTCTCAAAAATTCGAGTGACAA-3' | 5'-TGGGAGTAGACAAGGTACAACCC-3' |
| Nod2              | 5'-GCCAGTACGAGTGTGAGGAG -3'      | 5'-CCCTGACGTGCTGTAGAAGG-3'    |

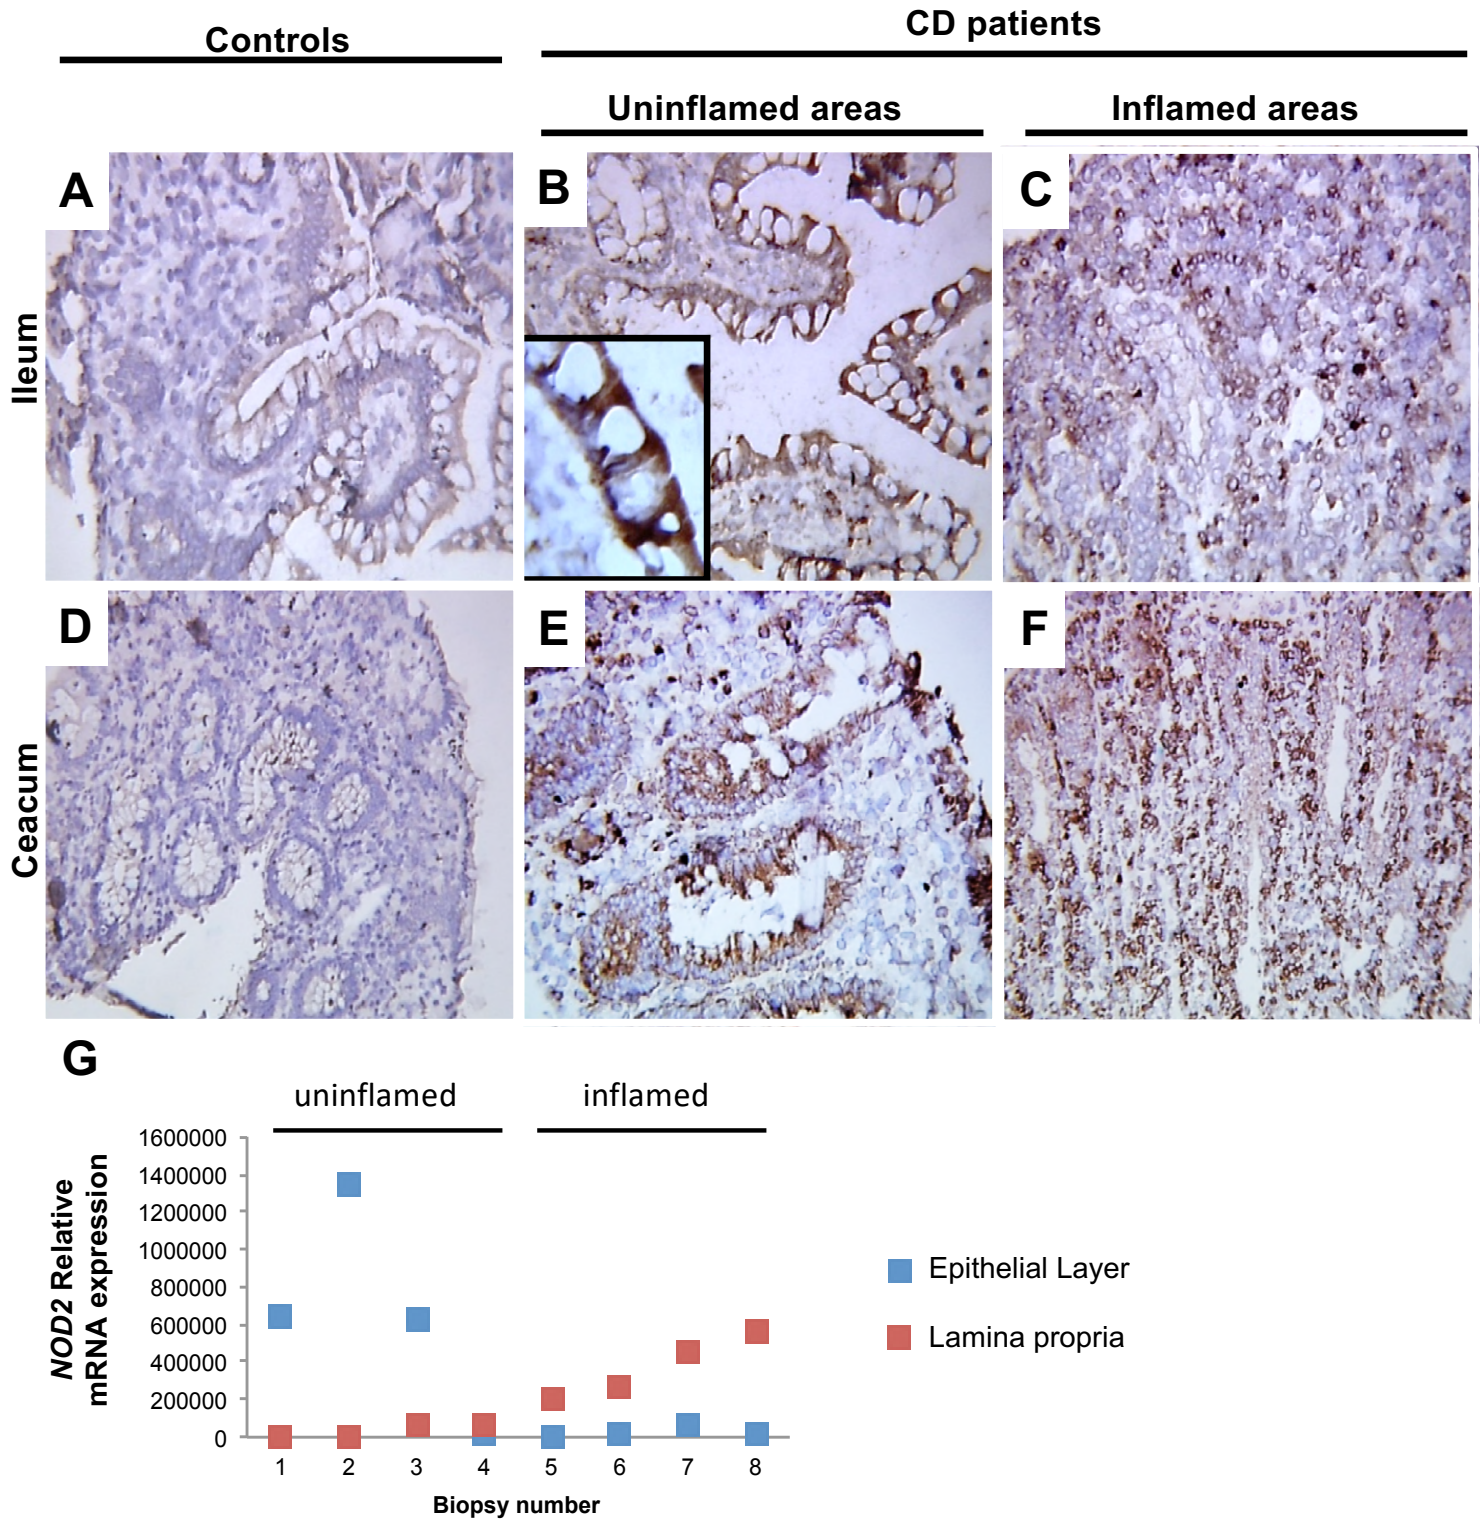

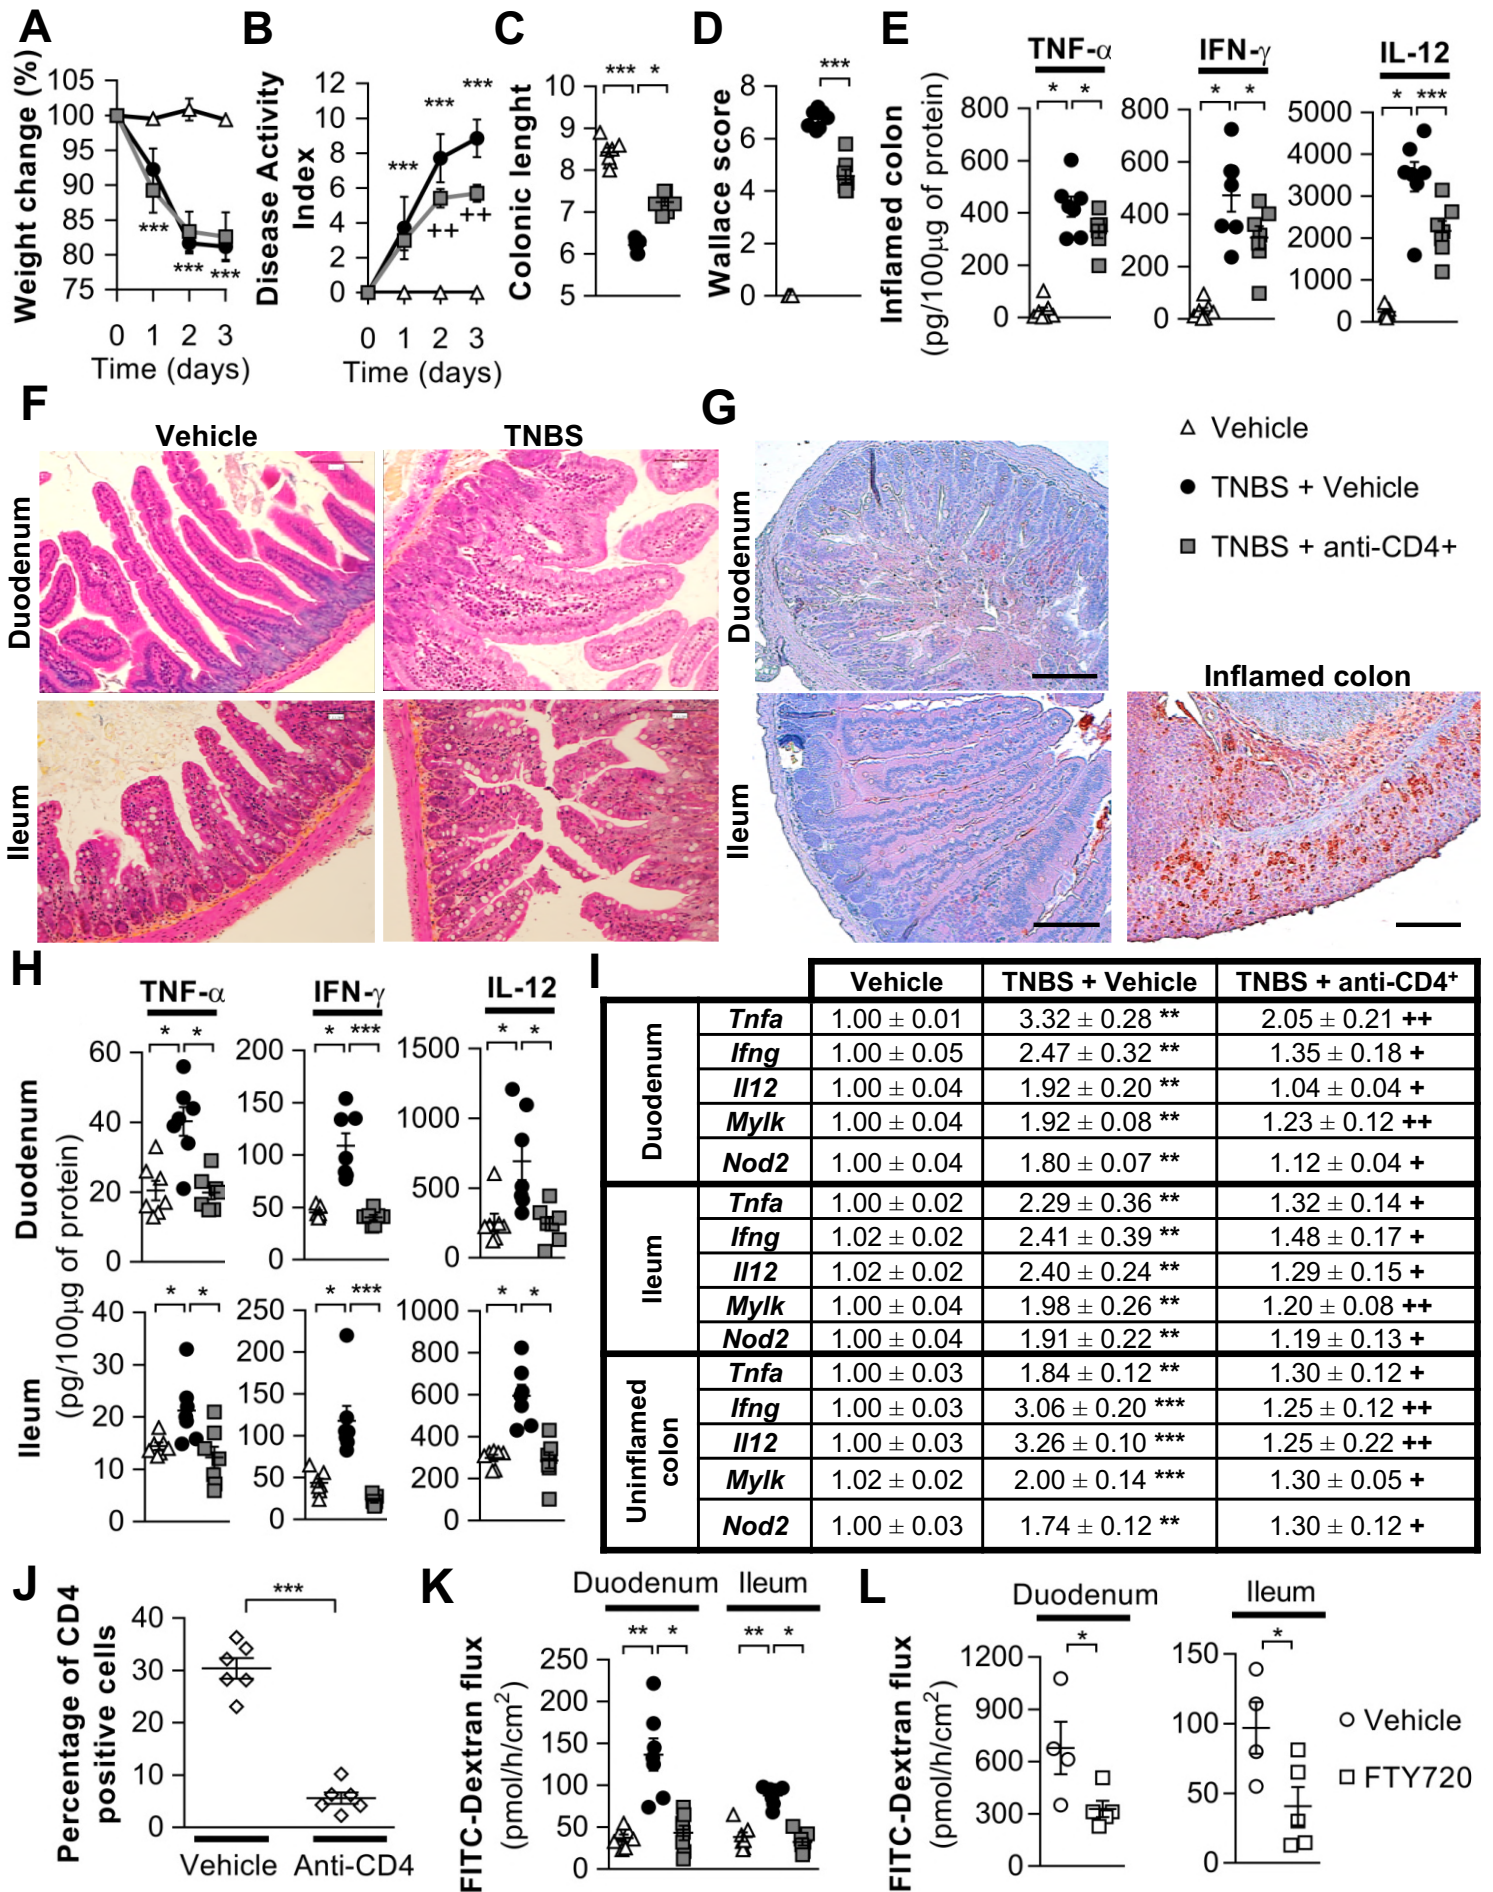



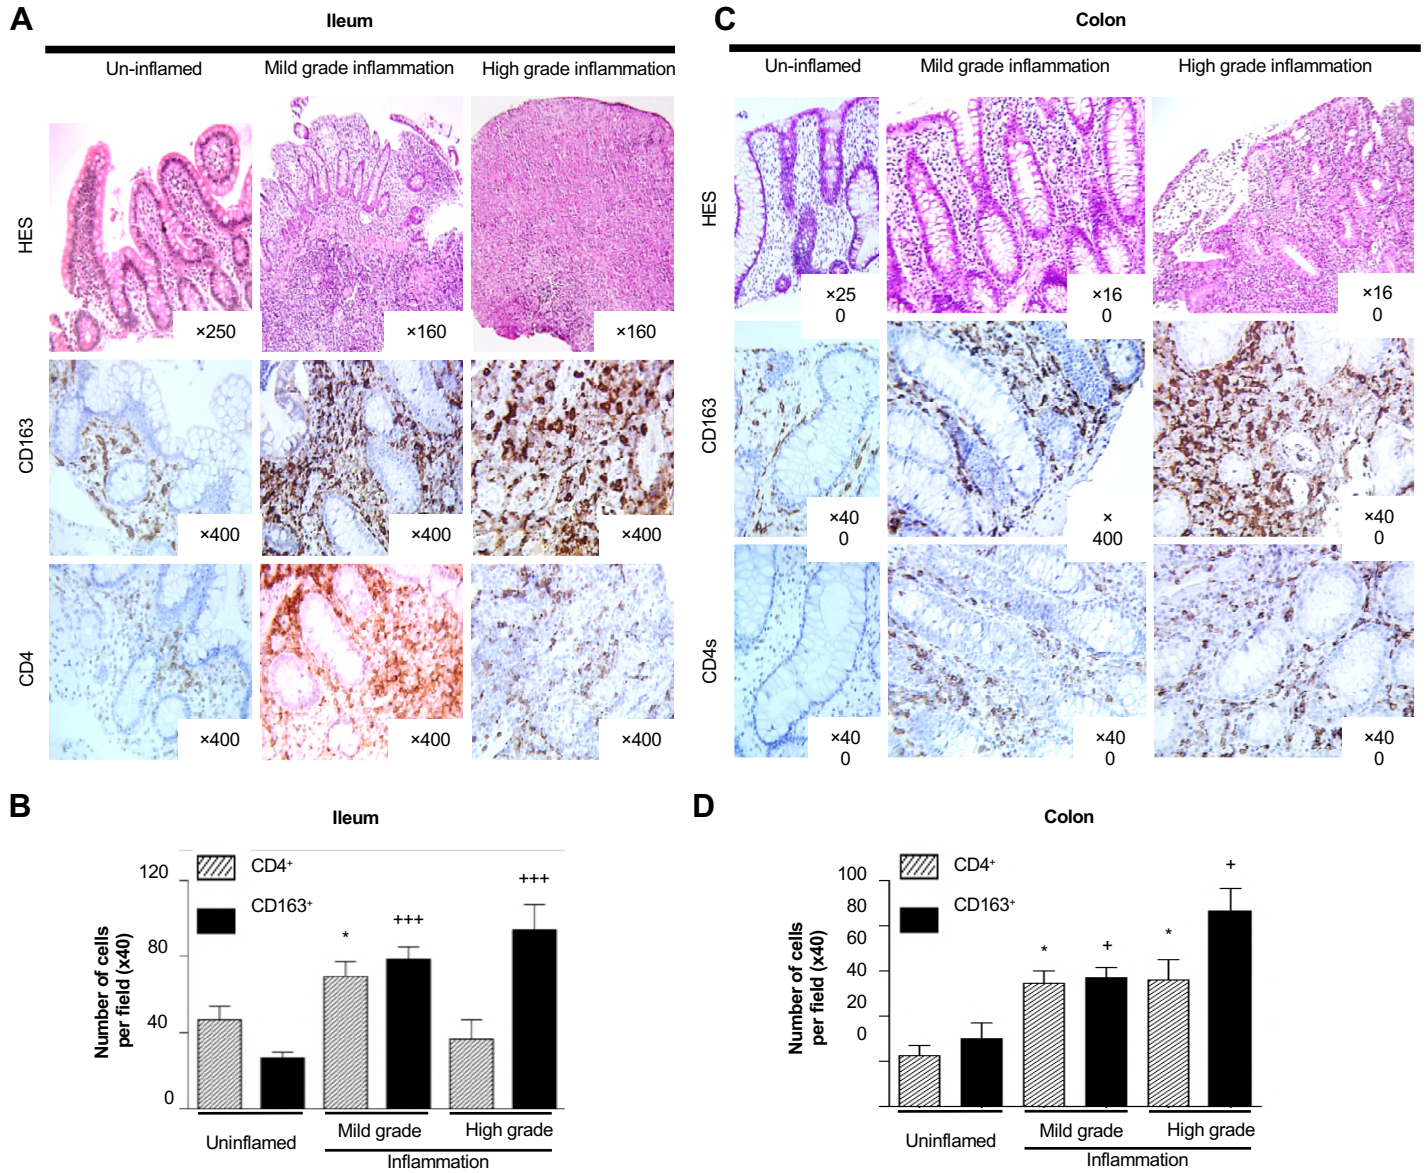

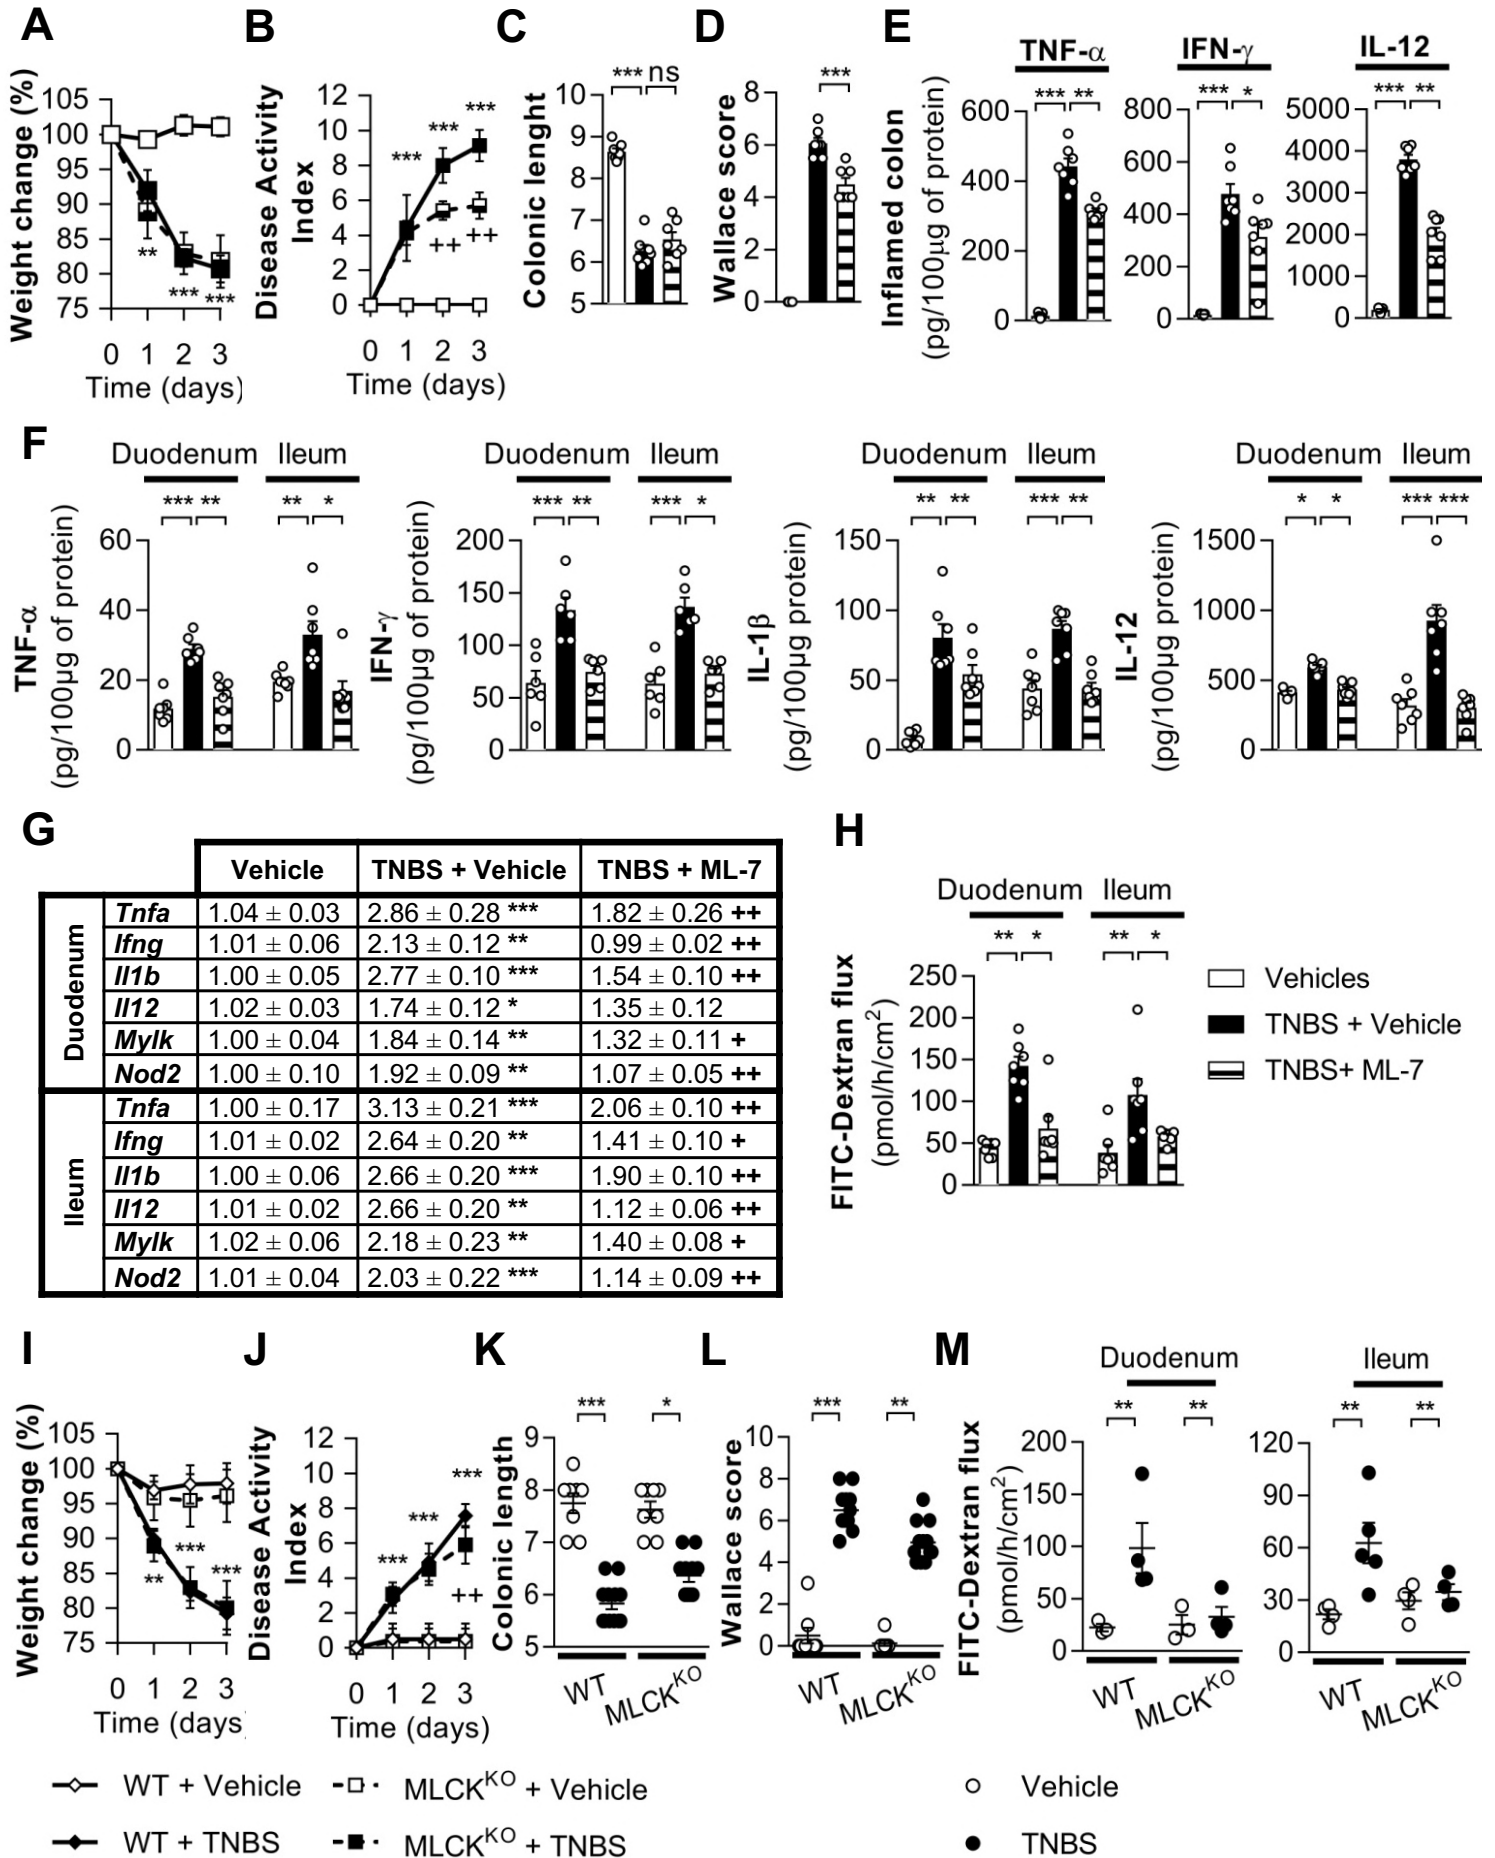

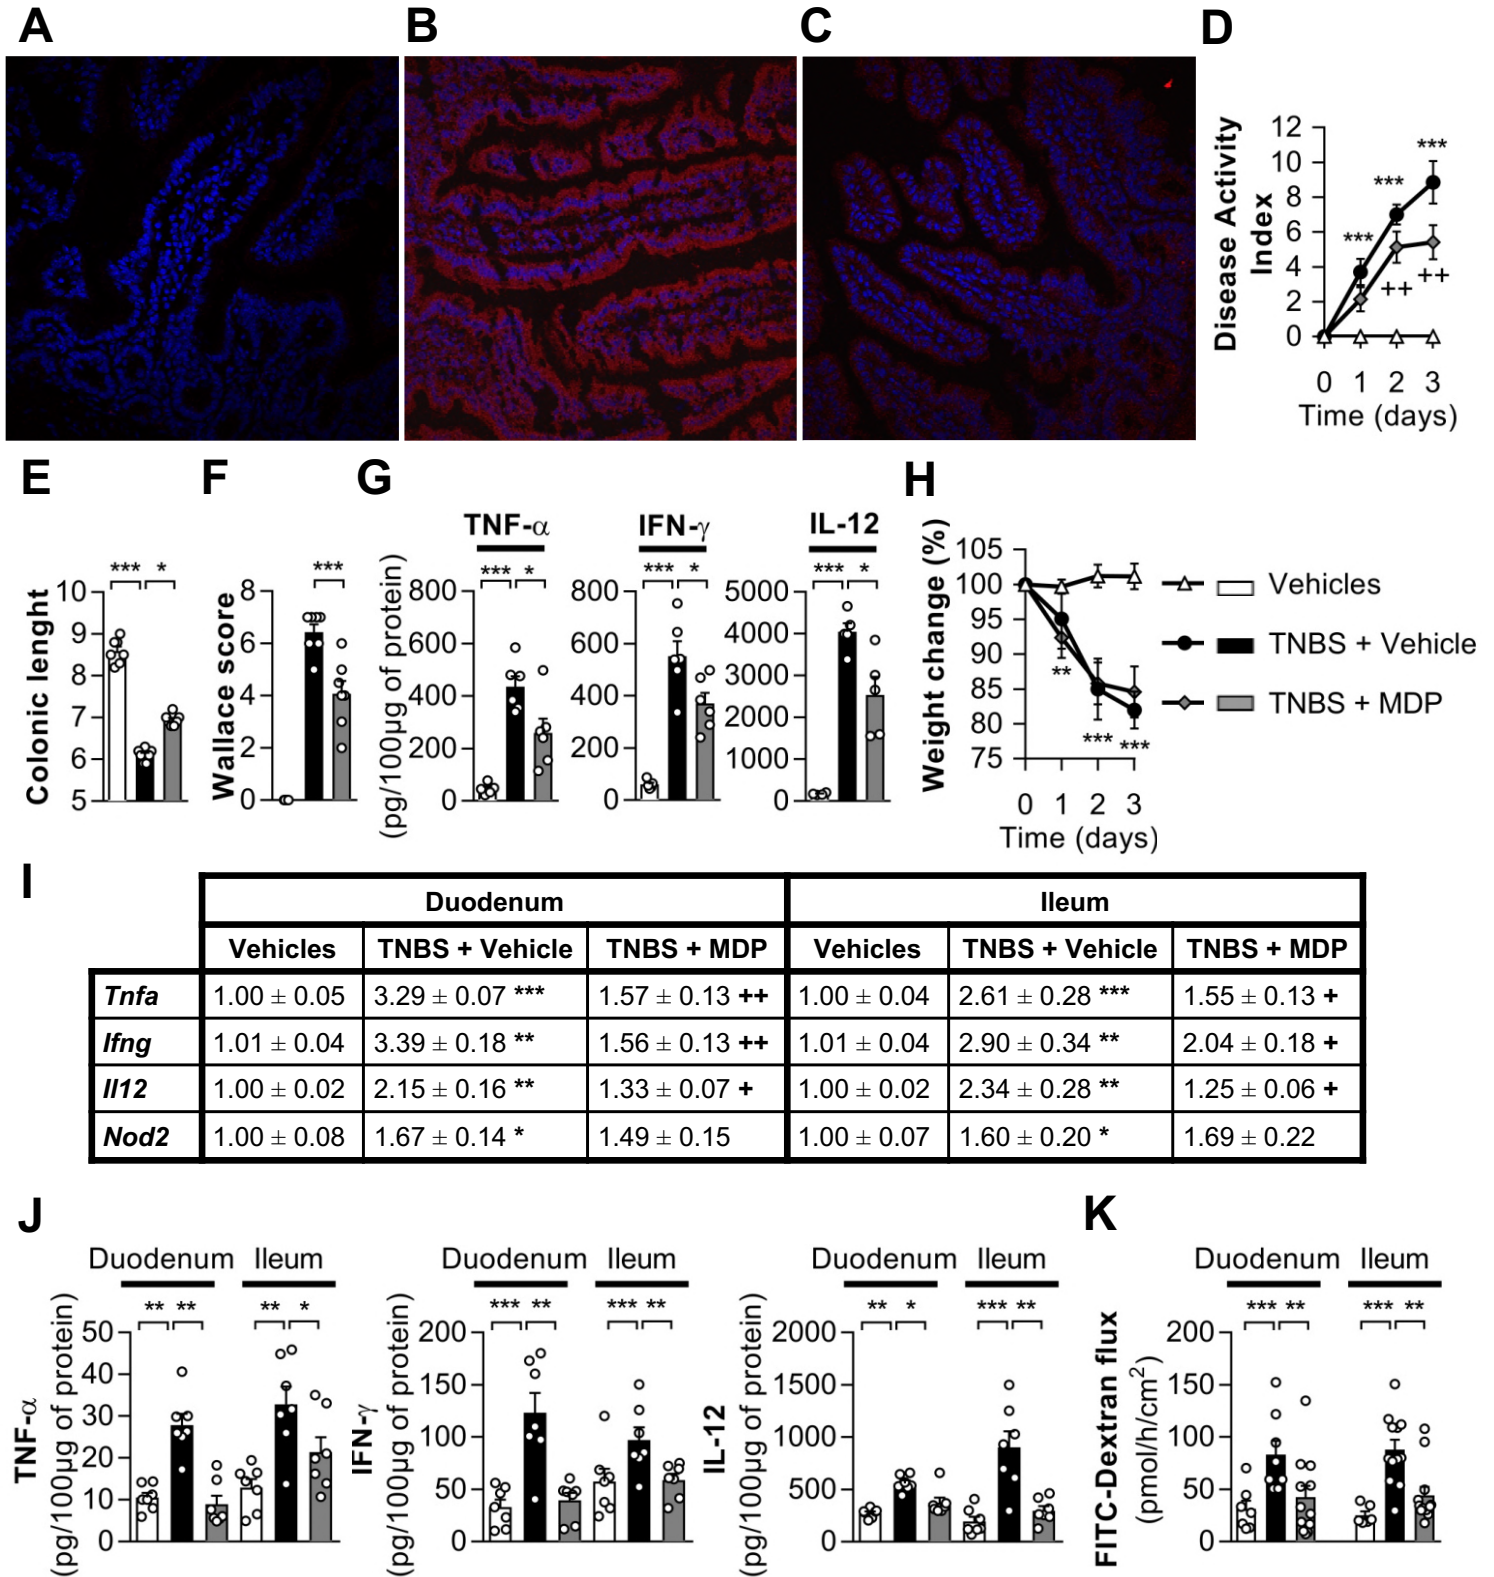

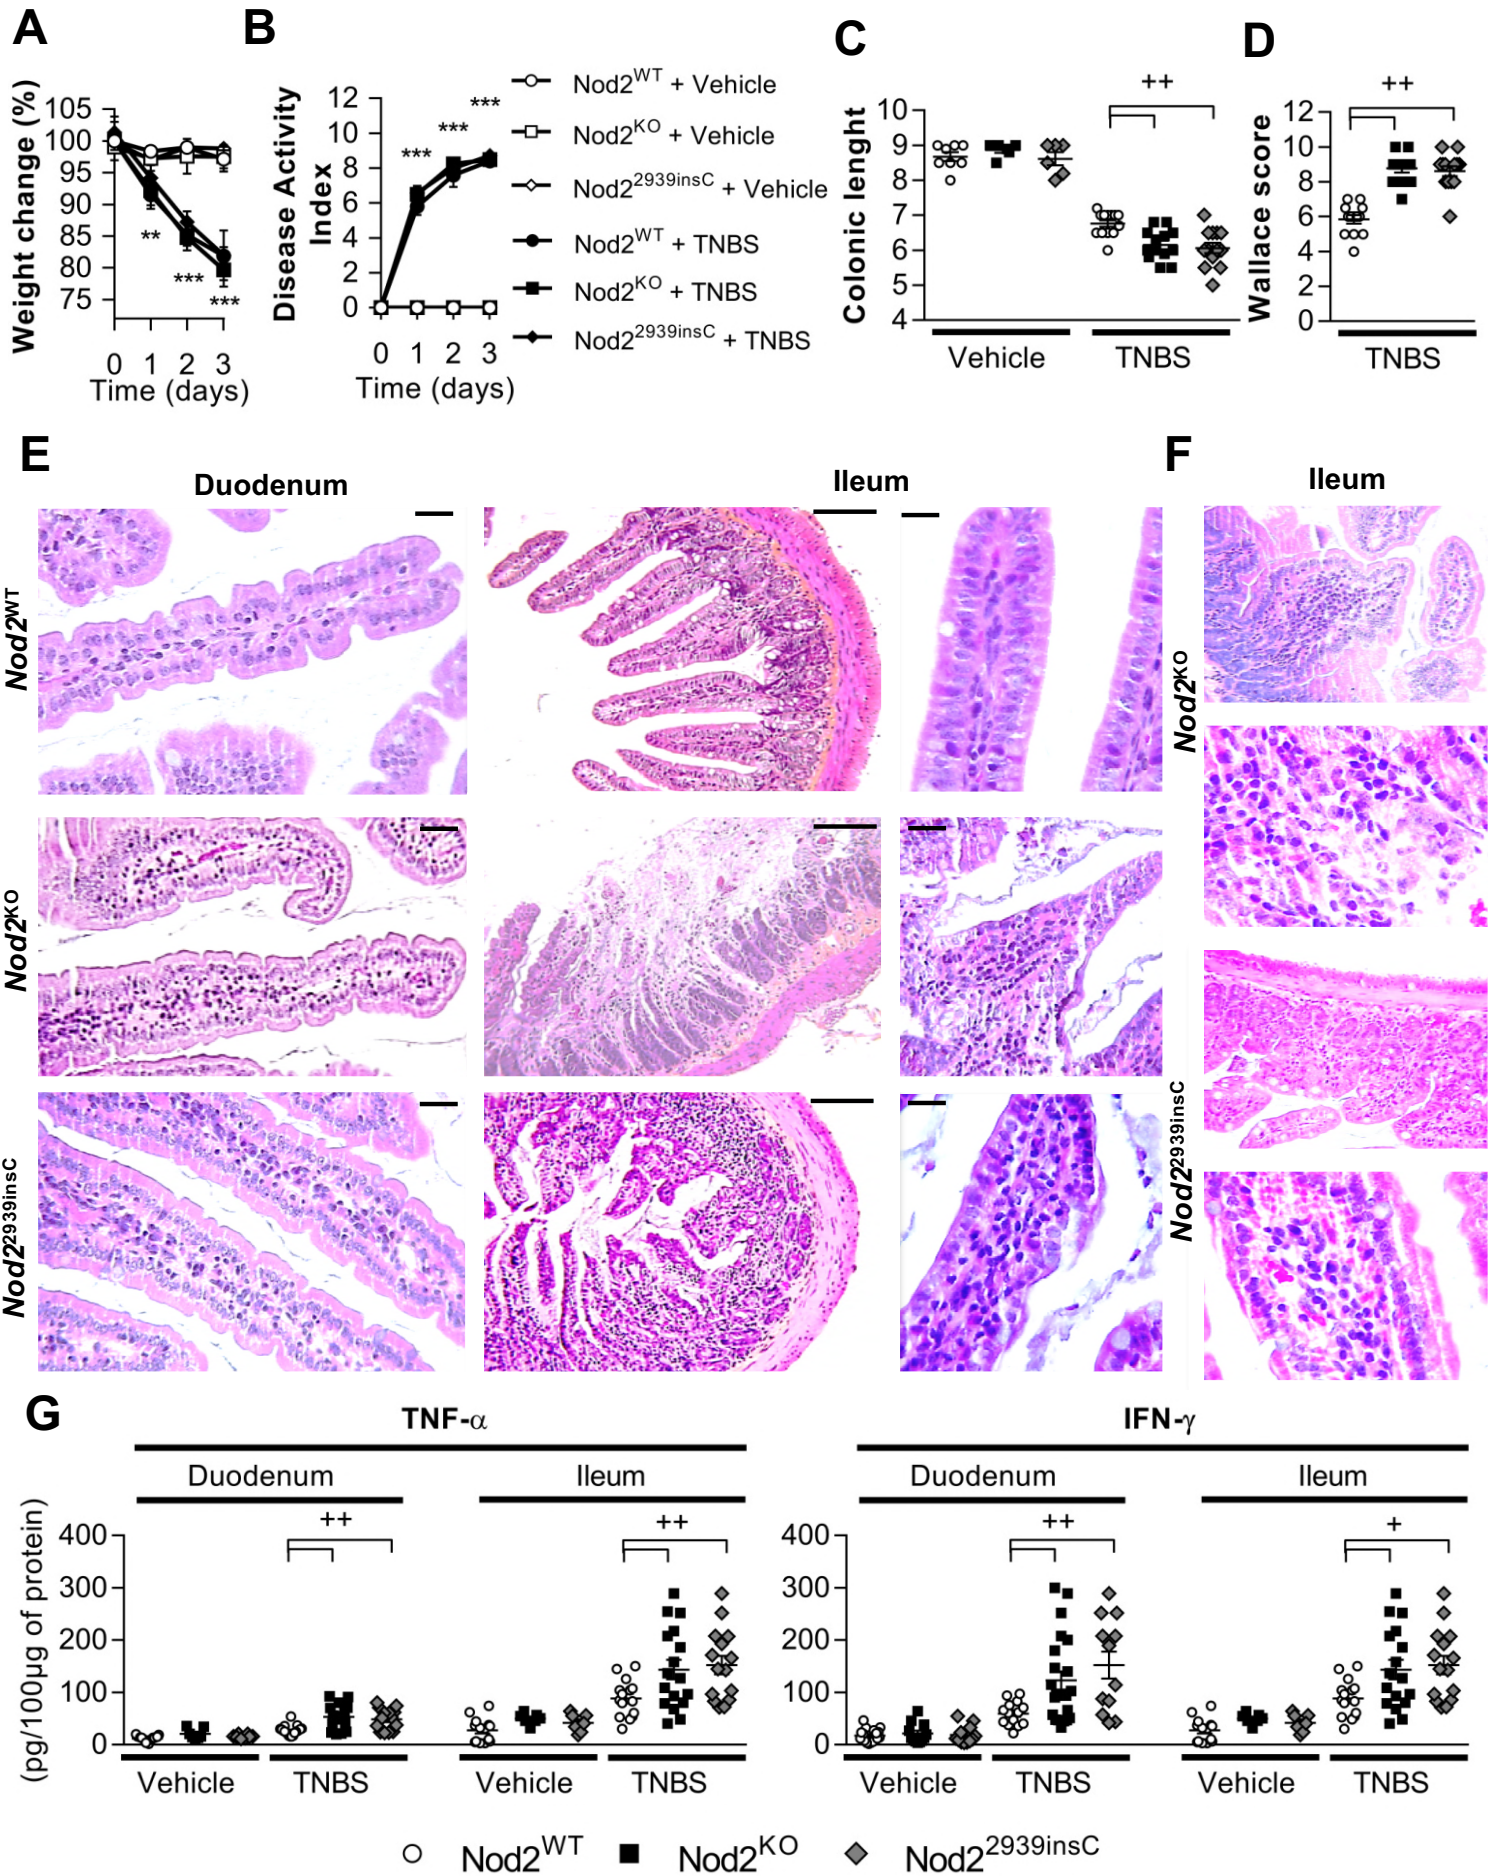

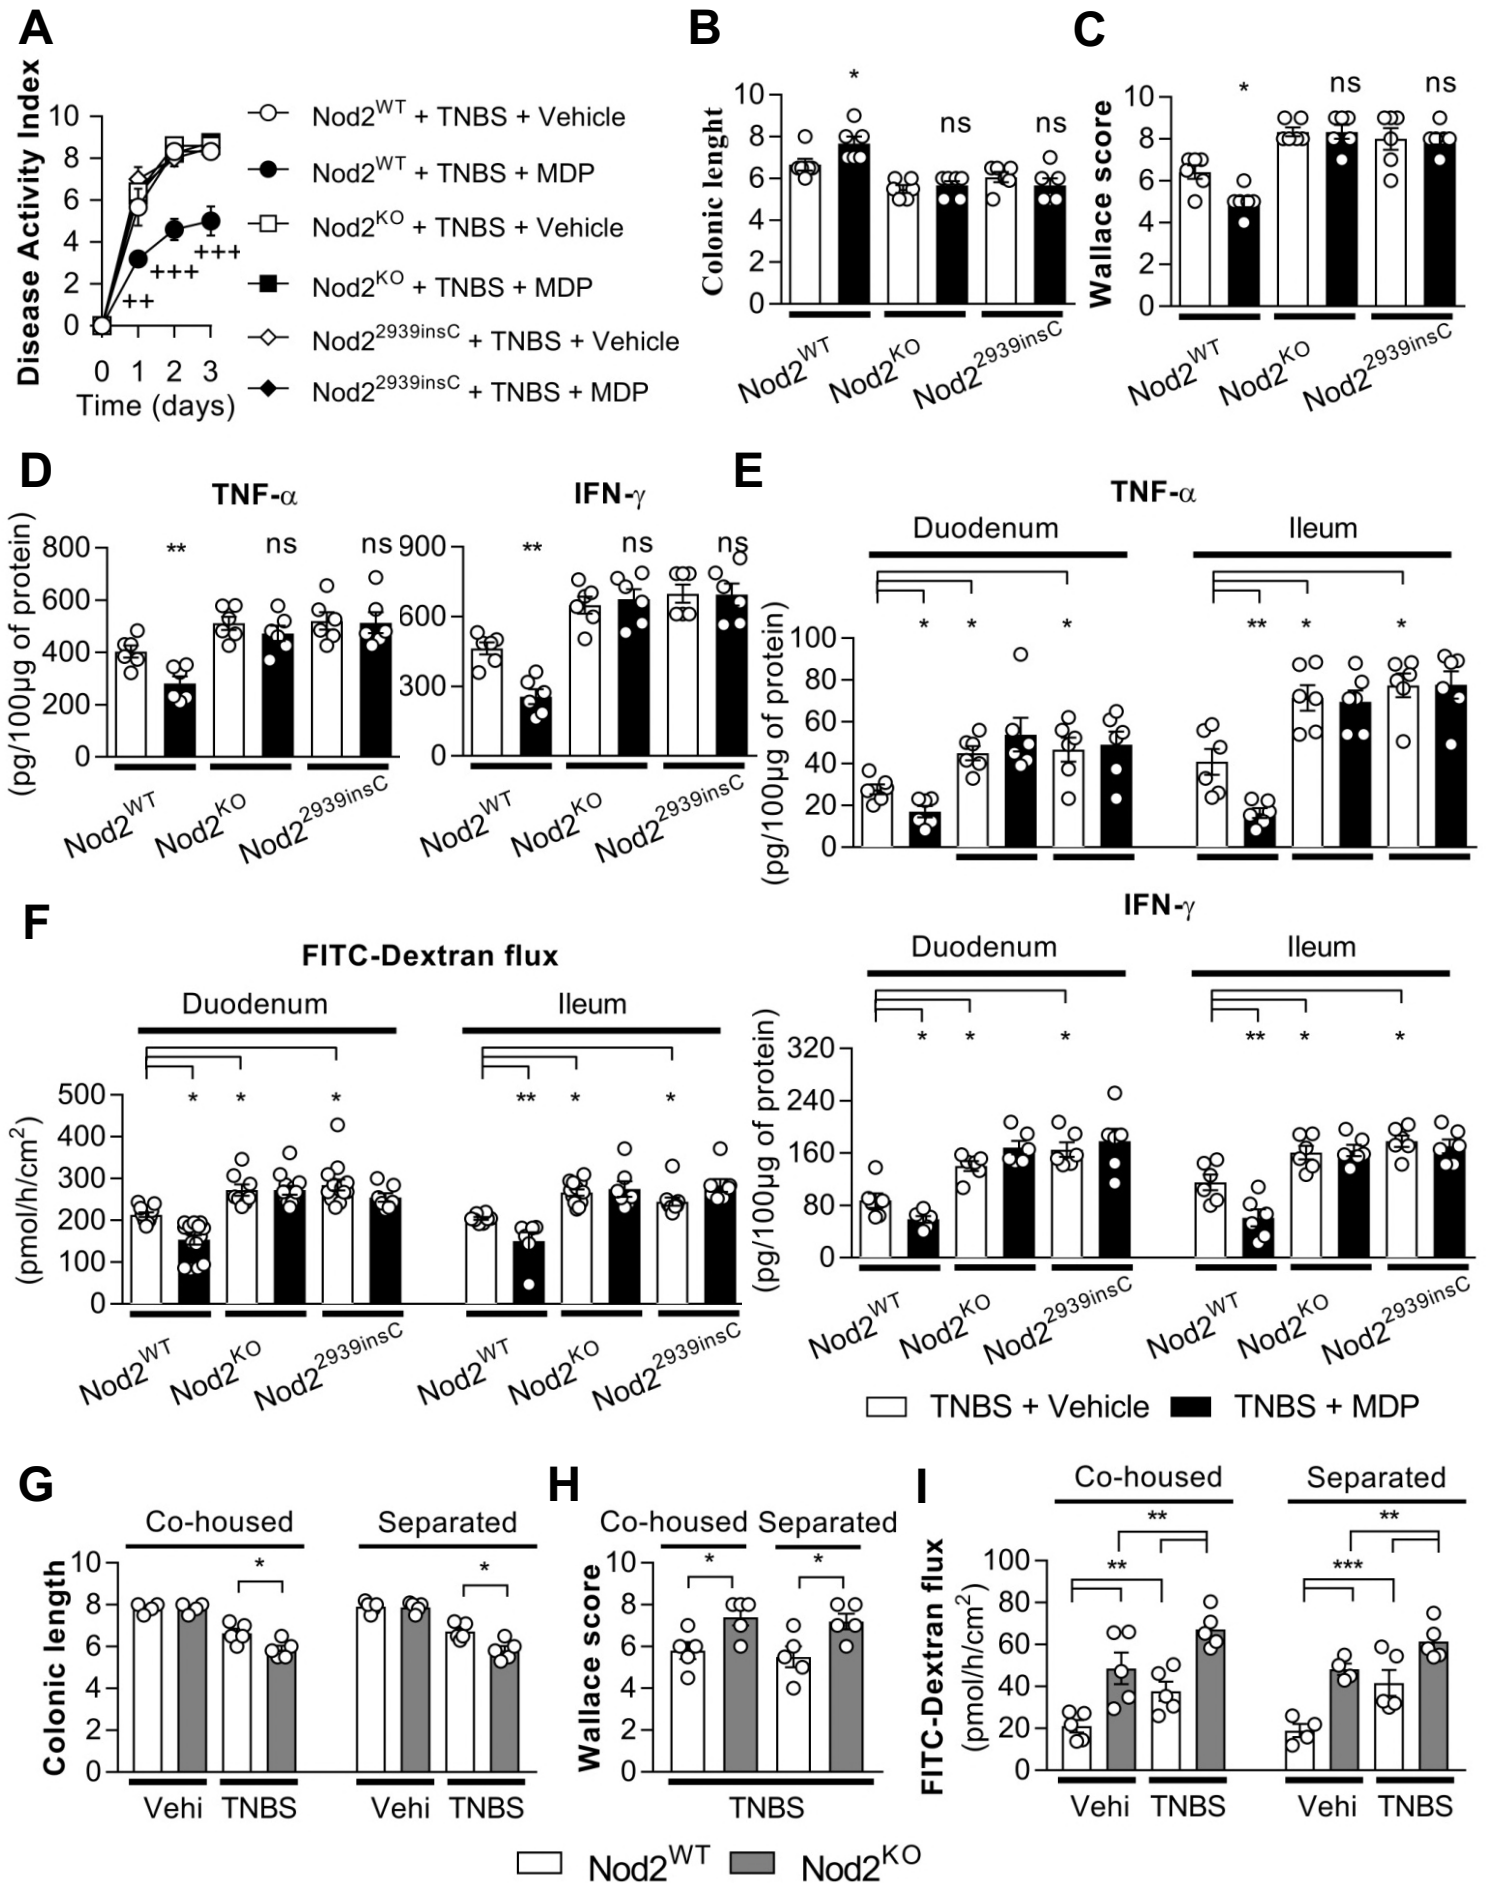

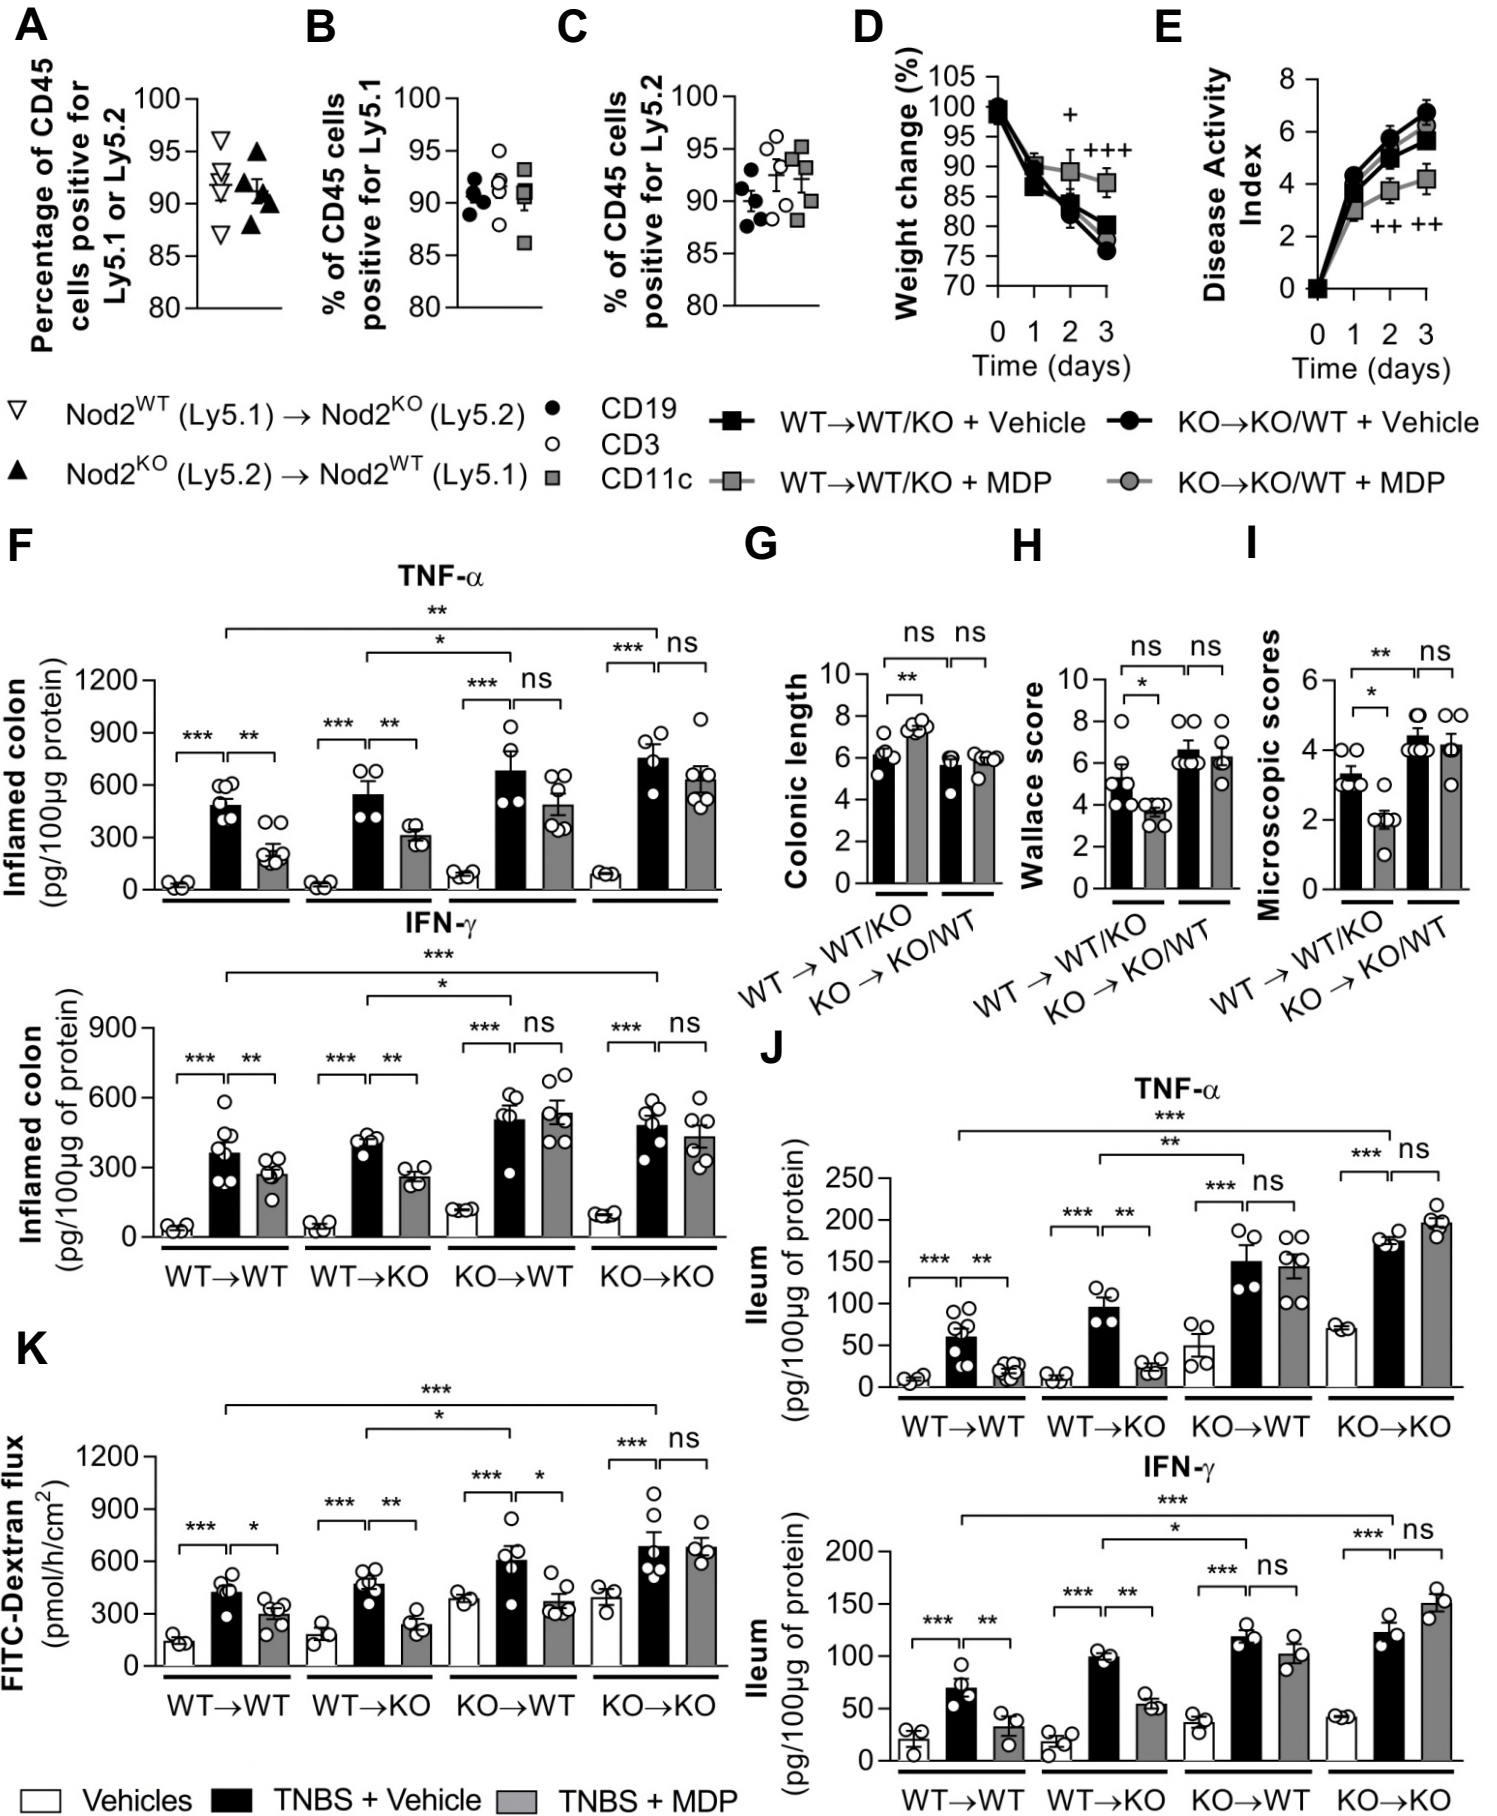

Source: https://www.biorxiv.org/content/biorxiv/early/2019/01/03/510933.full.pdf
